# Supplementary material for: Scoping Review of Economic Analyses of Rare Kidney Diseases
Source: PubMed Central journal article supplement (PMC11652074; doi:10.1016/j.ekir.2024.09.004), 2024-09-12
Supplement: mmc1.pdf [file mmc1.pdf]

## Classification and Listing of Rare Renal Diseases

### Categories:

1. Genetic cystic renal disease ORPHA:93587
2. Glomerular disease ORPHA:93548
3. Hematological disorder with renal involvement ORPHA:93614
4. Inherited renal cancer-predisposing syndrome ORPHA:319328
5. Nephropathy secondary to a storage or other metabolic disease ORPHA:93593
6. Rare cause of hypertension ORPHA:93618
7. Rare renal tubular disease ORPHA:93603
8. Rare renal tumor ORPHA:93619
9. Renal or urinary tract malformation ORPHA:93545
10. Thrombotic microangiopathy ORPHA:93573
11. Genetic diseases/ syndromes with kidney involvement: Groopman E list

### Sub-Classification of Categories

#### **1. Genetic cystic renal disease**

- Adult familial nephronophthisis-spastic quadriplegia syndrome ORPHA:2666
- Autosomal dominant polycystic kidney disease ORPHA:730
- Autosomal dominant polycystic kidney disease type 1 with tuberous sclerosis ORPHA:88924
- Autosomal dominant tubulointerstitial kidney disease ORPHA:34149
  - HNF1B-related autosomal dominant tubulointerstitial kidney disease ORPHA:93111
  - MUC1-related autosomal dominant tubulointerstitial kidney disease ORPHA:88949
  - REN-related autosomal dominant tubulointerstitial kidney disease ORPHA:217330
  - UMOD-related autosomal dominant tubulointerstitial kidney disease ORPHA:88950
- Autosomal recessive polycystic kidney disease ORPHA:731
- Bardet-Biedl syndrome ORPHA:110
- Cranioectodermal dysplasia ORPHA:1515
- Ellis Van Creveld syndrome ORPHA:289
- Hepatic fibrosis-renal cysts-intellectual disability syndrome ORPHA:2031
- Joubert syndrome with oculorenal defect ORPHA:2318
- Joubert syndrome with renal defect ORPHA:220497
- Karyomegalic interstitial nephritis ORPHA:401996
- Meckel syndrome ORPHA:564
- Neonatal diabetes-congenital hypothyroidism-congenital glaucoma-hepatic fibrosis-polycystic kidneys syndrome ORPHA:79118
- Nephronophthisis ORPHA:655
  - Infantile nephronophthisis ORPHA:93591
  - Juvenile nephronophthisis ORPHA:93592
  - Late-onset nephronophthisis ORPHA:93589
- Renal-hepatic-pancreatic dysplasia ORPHA:294415
- RHYNS syndrome ORPHA:140976
- Saldino-Mainzer syndrome ORPHA:140969
- Senior-Boichis syndrome ORPHA:84081
- Senior-Loken syndrome ORPHA:3156
- Tuberous sclerosis complex ORPHA:805
- Ventriculomegaly-cystic kidney disease ORPHA:443988

- Von Hippel-Lindau disease ORPHA:892

## 2. Glomerular Disease

- Collagen-related glomerular basement membrane disease ORPHA:544590
- Alport syndrome ORPHA:63
  - Autosomal dominant Alport syndrome ORPHA:88918
  - Autosomal recessive Alport syndrome ORPHA:88919
  - X-linked Alport syndrome ORPHA:88917
  - X-linked Alport syndrome-diffuse leiomyomatosis ORPHA:1018
  - HANAC syndrome ORPHA:73229
- Disorder with multisystemic involvement and glomerulopathy ORPHA:567562
  - Action myoclonus-renal failure syndrome ORPHA:163696
  - Autosomal dominant intermediate Charcot-Marie-Tooth disease type E ORPHA:93114
  - Congenital membranous nephropathy due to fetomaternal anti-neutral endopeptidase alloimmunization ORPHA:69063
  - Denys-Drash syndrome ORPHA:220
  - Familial steroid-resistant nephrotic syndrome with adrenal insufficiency ORPHA:506334
  - Familial steroid-resistant nephrotic syndrome with sensorineural deafness ORPHA:280406
  - Frasier syndrome ORPHA:347
  - Galloway-Mowat syndrome ORPHA:2065
  - Hypotrichosis-lymphedema-telangiectasia-renal defect syndrome ORPHA:69735
  - Interstitial lung disease-nephrotic syndrome-epidermolysis bullosa syndrome ORPHA:306504
  - MYH9-related disease ORPHA:182050
  - Nail-patella-like renal disease ORPHA:2613
  - Nail-patella syndrome ORPHA:2614
  - Nephrotic syndrome-epidermolysis bullosa-sensorineural deafness syndrome ORPHA:300333
  - Pierson syndrome ORPHA:2670
  - Schimke immuno-osseous dysplasia ORPHA:1830
  - Severe oculo-renal-cerebellar syndrome ORPHA:2715
- Idiopathic non-lupus full-house nephropathy ORPHA:567544
- Nephrotic syndrome without extrarenal manifestations ORPHA:567564
  - Genetic nephrotic syndrome ORPHA:564127
    - Congenital nephrotic syndrome, Finnish type ORPHA:839
    - Genetic steroid-resistant nephrotic syndrome ORPHA:656
  - Idiopathic nephrotic syndrome ORPHA:357502
    - Idiopathic steroid-resistant nephrotic syndrome ORPHA:567548
    - Idiopathic multidrug-resistant nephrotic syndrome ORPHA:567550
    - Idiopathic steroid-resistant nephrotic syndrome with sensitivity to second-line immunosuppressive therapy ORPHA:567552
    - Idiopathic steroid-sensitive nephrotic syndrome ORPHA:69061
    - Idiopathic steroid-sensitive nephrotic syndrome with secondary steroid resistance ORPHA:567546
- Primary membranoproliferative glomerulonephritis ORPHA:54370
  - C3 glomerulopathy ORPHA:329918
    - C3 glomerulonephritis ORPHA:329931
    - Dense deposit disease ORPHA:93571
  - Immunoglobulin-mediated membranoproliferative glomerulonephritis ORPHA:329903
- Primary membranous glomerulonephritis ORPHA:97560
- Systemic disease with glomerulopathy as a major feature ORPHA:567554

- Genetic systemic disease with glomerulopathy as a major feature ORPHA:567556
  - Autoimmune interstitial lung disease-arthritis syndrome ORPHA:444092
  - Familial Mediterranean fever ORPHA:342
  - Fibronectin glomerulopathy ORPHA:84090
  - Hereditary amyloidosis with primary renal involvement ORPHA:85450
  - AApoAI amyloidosis ORPHA:93560
  - AApoAII amyloidosis ORPHA:238269
  - AFib amyloidosis ORPHA:93562
  - ALys amyloidosis ORPHA:93561
  - Hypocomplementemic urticarial vasculitis ORPHA:36412
  - Lipoprotein glomerulopathy ORPHA:329481
  - Muckle-Wells syndrome ORPHA:575
- Non-genetic systemic disease with glomerulopathy as a major feature ORPHA:567558
  - AA amyloidosis ORPHA:85445
  - AApoAIV amyloidosis ORPHA:439232
  - Adult-onset Still disease ORPHA:829
  - AH amyloidosis ORPHA:442582
  - AL amyloidosis ORPHA:85443
  - Behçet disease ORPHA:117
  - Collagen type III glomerulopathy ORPHA:84087
  - Dermatomyositis ORPHA:221
  - IgG4-related kidney disease ORPHA:449395
  - Immunotactoid or fibrillary glomerulopathy ORPHA:91137
  - Immunotactoid glomerulopathy ORPHA:97567
  - Non-amyloid fibrillary glomerulopathy ORPHA:97566
  - Juvenile dermatomyositis ORPHA:93672
  - Juvenile polymyositis ORPHA:93568
  - Mixed connective tissue disease ORPHA:809
  - Non-amyloid monoclonal immunoglobulin deposition disease ORPHA:86861
  - Heavy chain deposition disease ORPHA:93556
  - Light and heavy chain deposition disease ORPHA:93557
  - Light chain deposition disease ORPHA:93558
  - Polymyositis ORPHA:732
  - Reynolds syndrome ORPHA:779
  - Sarcoidosis ORPHA:797
  - Systemic sclerosis ORPHA:90291
  - Diffuse cutaneous systemic sclerosis ORPHA:220393
  - Limited cutaneous systemic sclerosis ORPHA:220402
  - Limited systemic sclerosis ORPHA:220407
  - Systemic vasculitis associated with glomerulopathy ORPHA:567560
  - Anti-glomerular basement membrane disease ORPHA:375
  - Buerger disease ORPHA:36258
  - Cryoglobulinemic vasculitis ORPHA:91138
  - Mixed cryoglobulinemia type II ORPHA:93554
  - Mixed cryoglobulinemia type III ORPHA:93555
  - Eosinophilic granulomatosis with polyangiitis ORPHA:183
  - Giant cell arteritis ORPHA:397
  - Granulomatosis with polyangiitis ORPHA:900
  - Immunoglobulin A vasculitis ORPHA:761
  - Microscopic polyangiitis ORPHA:727
  - Pauci-immune glomerulonephritis ORPHA:93126
  - Pauci-immune glomerulonephritis with ANCA ORPHA:97563

- Pauci-immune glomerulonephritis without ANCA ORPHA:97564
- Pediatric systemic lupus erythematosus ORPHA:93552
- Polyarteritis nodosa ORPHA:767
- Primary polyarteritis nodosa ORPHA:439737
- Cutaneous polyarteritis nodosa ORPHA:439729
- Single-organ polyarteritis nodosa ORPHA:439755
- Systemic polyarteritis nodosa ORPHA:439762
- Secondary polyarteritis nodosa ORPHA:439746
- Relapsing polychondritis ORPHA:728
- Systemic lupus erythematosus ORPHA:536
- Takayasu arteritis ORPHA:3287

### **3. Hematological disorder with renal involvement**

- Beta thalassemia
  - Beta thalassemia intermedia
  - Beta thalassemia major
  - Dominant beta thalassemia
- Fanconi anemia
- Sickle cell anemia

### **4. Inherited renal cancer-predisposing syndrome**

- Beckwith Wiedemann syndrome
  - Beckwith Wiedemann syndrome due to 11p15 microdeletion
  - Beckwith Wiedemann syndrome due to 11p15 microduplication
  - Beckwith Wiedemann syndrome due to 11p15 translocation/inversion
  - Beckwith Wiedemann syndrome due to CDKN1C mutation
  - Beckwith Wiedemann syndrome due to imprinting defect of 11p15
  - Beckwith Wiedemann syndrome due to NSD1 mutation
  - Beckwith Wiedemann syndrome due to paternal uniparental disomy of chromosome 11
- Birt-Hogg-Dube syndrome
- Familial papillary thyroid carcinoma with renal papillary neoplasia
- Global developmental delay- lung cysts- overgrowth- Wilms tumor syndrome
- Hereditary clear cell renal cell carcinoma
- Hereditary leiomyomatosis and renal cell cancer
- Hereditary papillary renal cell carcinoma
- Hyperparathyroidism- jaw tumor syndrome
- Inherited cancer- predisposing syndrome due to biallelic BRCA2 mutations
- Perlman syndrome
- Tuberous sclerosis complex
- Von Hippel-Lindau disease
- WAGR syndrome

### **5. Nephropathy secondary to a storage or metabolic disorder**

- Adenine phosphoribosyltransferase deficiency
- Alkaptonuria
- Alpha-1-antitrypsin deficiency
- Amelogenesis imperfecta-nephrocalcinosis syndrome
- Autosomal recessive infantile hypercalcemia
- Congenital disorder of glycosylation with nephropathy as a major feature
  - ALG8-CDG
  - Musculocontractural Ehlers-Danlos syndrome
  - SLC35A1-CDG
- Dent disease

- Dent disease type 1 (CLCN5-related)
  - Dent disease type 2 (OCRL-related)
- Enamel-renal syndrome
- Fabry disease
- Familial renal glucosuria
- Fanconi-Bickel syndrome
- Galactosemia
  - Classic galactosemia
  - Galactokinase deficiency
  - Galactose epimerase deficiency
    - Erythrocyte galactose epimerase deficiency
    - Generalised galactose epimerase deficiency
  - Galactose mutarotase deficiency
- Gitelman-like kidney tubulopathy due to mitochondrial DNA mutation
- Glycogen storage disease due to glucose-6-phosphatase deficiency
  - Glycogen storage disease due to glucose-6-phosphatase deficiency type Ia
  - Glycogen storage disease due to glucose-6-phosphatase deficiency type Ib
- Glycogen storage disease due to GLUT2 deficiency
- Hartnup disease
- Hereditary fructose intolerance
- Hereditary xanthinuria
  - Xanthinuria type I
  - Xanthinuria type II
- Hypertrophic cardiomyopathy with kidney anomalies due to mitochondrial DNA mutation
- Hypoxanthine-guanine phosphoribosyltransferase deficiency
  - Hypoxanthine-guanine phosphoribosyltransferase partial deficiency
  - Lesch-Nyhan syndrome
- Imlerslund-Grasbeck syndrome
- Infantile nephropathic cystinosis
- Juvenile cataract-microcornea-renal glucosuria syndrome
- Juvenile nephropathic cystinosis
- LCAT deficiency
  - Familial LCAT deficiency
  - Fish-eye disease
- Lowe Syndrome
- Lysinuric protein intolerance
- Phosphoribosylpyrophosphate synthetase superactivity
  - Mild phosphoribosylpyrophosphate synthetase superactivity
  - Severe phosphoribosylpyrophosphate synthetase superactivity
- Porphyria
  - Acute hepatic porphyria
    - Acute intermittent porphyria
    - Hereditary coproporphyria
    - Porphyria due to ALA dehydratase deficiency
    - Porphyra variegata
  - Autosomal erythropoietic protoporphyria
  - Chronic hepatic porphyria
    - Hepatoerythropoietic porphyria
    - Porphyria cutanea tarda
  - Congenital erythropoietic porphyria
  - Erythropoietic uroporphyria associated with myeloid malignancy
  - X-linked erythropoietic protoporphyria
- Primary hyperoxaluria
  - Primary hyperoxaluria type 1
  - Primary hyperoxaluria type 2

- Primary hyperoxaluria type 3
- Sialidosis type 2
  - Congenital sialidosis type 2
  - Juvenile sialidosis type 2
- Tyrosinemia type 1
- Tubulopathy due to mitochondrial oxidative phosphorylation disorder
- Vitamin B12-responsive methylmalonic acidemia
  - Vitamin B12-responsive methylmalonic acidemia type cblA
  - Vitamin B12-responsive methylmalonic acidemia type cblB
  - Vitamin B12-responsive methylmalonic acidemia type cblDv2
- Vitamin B12-unresponsive methylmalonic acidemia
  - Vitamin B12-unresponsive methylmalonic acidemia type mut-
  - Vitamin B12-unresponsive methylmalonic acidemia type mut0
- Wilson disease
- Zellweger syndrome

## 6. Rare causes of Hypertension

- Congenital renal artery stenosis
- Apparent mineralocorticoid excess
- Autosomal dominant progressive nephropathy with hypertension
- Brachydactyly-arterial hypertension syndrome
- William syndrome
- Pseudoxanthoma elasticum
- Liddle syndrome
- Familial hyperthyroidism due to mutation in TSH receptor
- Hypertension due to gain of function mutation in the mineralocorticoid receptor
- Liddle syndrome
- Familial Hyperaldosteronism (types 1, 2, 3)
- Neurofibromatosis type 1
  - 17q11 microdeletion syndrome ORPHA:97685
  - Neurofibromatosis type 1 due to NF1 mutation or intragenic deletion
- Pseudohypoaldosteronism type 2 (2A,2B, 2C, 2D, 2E)
- Pseudoxanthoma elasticum
- Williams Syndrome

## 7. Rare renal tubular disease

- Alstrom syndrome
- Acquired monoclonal Ig light chain associated Fanconi syndrome
- Atypical Fanconi syndrome-neonatal hyperinsulinism syndrome
- Autosomal dominant primary hypomagnesemia with hypocalciuria
- Cataract nephropathy encephalopathy syndrome
- Bartter syndrome type 1,2,3,4,5
- Cystinuria type A, B
- Dominant hypophosphatemia with nephrolithiasis or osteoporosis
- EAST syndrome
- EGF related primary hypomagnesemia with intellectual disability
- Gitelman like kidney tubulopathy due to mitochondrial DNA mutation
- Gitelman syndrome
- Hereditary renal hypouricemia
- Hypertrophic cardiomyopathy with kidney anomalies due to mitochondrial DNA mutation
- Hyperuricemia pulmonary hypertension- renal failure- alkalosis syndrome
- Hypohidrosis- electrolyte imbalance-lacrimal gland dysfunction- ichthyosis- xerostomia syndrome
- Hypophosphatemic rickets

- Autosomal dominant hypophosphatemic rickets
- Autosomal recessive hypophosphatemic rickets
- Dent disease (type 1,2)
- Dominant hypophosphatemia with nephrolithiasis or osteoporosis
- Hereditary hypophosphatemic rickets with hypercalciuria
- X-linked hypophosphatemia
- Hypotonia- cystinuria type 1 syndrome
  - 2p21 microdeletion syndrome
  - Hypotonia-cystinuria syndrome
- Idiopathic hypercalciuria
- Isolated autosomal dominant hypomagnesemia, Glaudemans type
- Jeune syndrome
- Kidney tubulopathy-dilated cardiomyopathy syndrome
- Mitochondrial DNA depletion syndrome, hepatocerebrorenal form
- Nephrogenic Diabetes insipidus
- Nephrogenic diabetes insipidus-intracranial calcification- short stature-facial dysmorphism syndrome
- Nephrogenic syndrome of inappropriate diuresis
- Oculocerebrorenal syndrome of Lowe
- Oncogenic osteomalacia
- Primary Fanconi renal tubular syndrome
- Primary hypomagnesemia-generalized seizure -intellectual disability-obesity syndrome
- Primary Hypomagnesemia- refractory seizure-intellectual disability syndrome
- Primary hypomagnesemia with hypercalciuria and nephrocalcinosis
  - With and without severe ocular involvement
- Primary hypomagnesemia with secondary hypocalcemia
- Renal Tubular Acidosis
  - Proximal renal tubular acidosis
  - Distal renal tubular acidosis
  - Osteopetrosis with renal tubular acidosis
  - Central nervous system calcification-deafness-tubular acidosis- anemia syndrome
- Pseudohypoaldosteronism type 1,2
- Pseudohypoparathyroidism
  - With and Without Albright hereditary osteodystrophy
- Psychomotor regression-oculomotor apraxia-movement disorder-nephropathy syndrome
- Tubulointerstitial nephritis and uveitis syndrome

## **8. Rare Renal Tumors**

- Benign metanephric tumor
- Clear cell sarcoma of kidney
- Congenital mesoblastic nephroma
- Cystic hamartoma of lung and kidney
- Multiloculated renal cyst
- Nephroblastoma
- Renal cell carcinoma
- Acquired cystic disease -associated renal cell carcinoma
- Chromophobe renal cell carcinoma
- Collecting duct carcinoma
- MiT family translocation renal cell carcinoma
- Mucinous tubular and spindle cell renal carcinoma
- Papillary renal cell carcinoma
- Renal medullary carcinoma
- Tubulocystic renal cell carcinoma

- Clear cell renal carcinoma
- Clear cell papillary renal cell carcinoma
- Multilocular cystic renal neoplasm of low malignant potential

### **9. Renal or urinary tract malformation**

Non-syndromic renal or urinary tract malformation:

- Congenital hydronephrosis
  - Congenital bilateral megacalycosis
  - Unilateral congenital megacalycosis
- Ureteropelvic junction (UPJ) obstruction bilateral or in solitary kidney
- Congenital primary megaureter, nonrefluxing and unobstructed form
- Congenital primary megaureter, obstructed form
- Congenital primary megaureter, refluxing and obstructed form
- Congenital primary megaureter, refluxing form
- Primary megaureter, adult-onset form
- Patent urachus
- Urachal cyst
- Urachal diverticulum
- Urachal sinus
- Duplication of urethra
- Exstrophy-epispadias complex
- Bladder exstrophy
- Cloacal exstrophy
- Isolated epispadias
- Familial vesicoureteral reflux
- Vesicoureteral reflux, high grade
- Anterior urethral valve
- Atresia of urethra
- Posterior urethral valve
- Prune belly syndrome
- Congenital hydronephrosis
- Medullary sponge kidney
- Megacystis-megaureter syndrome
- Bilateral multicystic dysplastic kidney
- Unilateral multicystic dysplastic kidney
- Oligomeganephronia
- Bilateral Renal agenesis
- Unilateral Renal agenesis
- Renal dysplasia, bilateral
- Renal dysplasia, unilateral
- Renal hypoplasia, bilateral
- Renal hypoplasia, unilateral
- Drug-related renal tubular dysgenesis
- Renal tubular dysgenesis due to twin-twin transfusion
- Renal tubular dysgenesis of genetic origin
- Neurogenic bladder, congenital or acquired form

Syndromic renal or urinary tract malformation:

- 22q11.2 deletion syndrome (Di George syndrome)
- 8q24.3 microdeletion syndrome
- Acrorenal syndrome
- Acroosteolysis dominant type



- Alagille syndrome due to 20p12 microdeletion
- Alagille syndrome due to a JAG1 point mutation
- Alagille syndrome due to a NOTCH2 point mutation
- Aniridia-renal agenesis-psychomotor retardation syndrome
- AREDYLD (acral-renal-ectodermal-dysplasia-lipoatrophic-diabetes) syndrome
- Arthrogyposis-renal dysfunction-cholestasis syndrome
- Atherosclerosis-deafness-diabetes-epilepsy-nephropathy syndrome
- Axial mesodermal dysplasia spectrum
- Bardet-Biedl syndrome (renal/urinary tract malformation) – types 1-12, 17-19
- Beckwith-Wiedemann syndrome due to 11p15 microdeletion
- Beckwith-Wiedemann syndrome due to 11p15 microduplication
- Beckwith-Wiedemann syndrome due to 11p15 translocation/inversion
- Beckwith-Wiedemann syndrome due to CDKN1C mutation
- Beckwith-Wiedemann syndrome due to imprinting defect of 11p15
- Beckwith-Wiedemann syndrome due to NSD1 mutation
- Beckwith-Wiedemann syndrome due to paternal uniparental disomy of chromosome 11
- BNAR (Bifid nose, anorectal and renal anomalies) syndrome
- BOR (branchio-oto-renal) syndrome
- Cat-eye syndrome
- Caudal regression syndrome
- CHARGE syndrome
- Congenital vertebral-cardiac-renal anomalies syndrome
- Cornelia de Lange syndrome
- Cystic hamartoma of lung and kidney
- Double uterus-hemivagina-renal agenesis syndrome
- Dyschondrosteosis-nephritis syndrome
- EEC (Ectrodactyly-ectodermal dysplasia-cleft lip/palate) syndrome
- Ellis Van Creveld syndrome
- Faciocardiorenal syndrome
- Fibulo-ulnar hypoplasia-renal anomalies syndrome
- Fraser syndrome
- Hajdu-Cheney syndrome
- HNF1B-related autosomal dominant tubulointerstitial kidney disease
- Holoprosencephaly-radial heart renal anomalies syndrome
- Hydrocephalus-blue sclerae-nephropathy syndrome
- Hypoparathyroidism-sensorineural deafness-renal disease syndrome
- Infundibulopelvic stenosis-multicystic kidney syndrome
- Ichthyosis-intellectual disability-dwarfism-renal impairment syndrome
- Jeune syndrome (renal/urinary tract malformation)
- Kabuki Syndrome
- Kallmann syndrome
- Lethal fetal brain malformation-duodenal atresia-bilateral renal hypoplasia syndrome
- Lethal fetal cerebrenogenitourinary agenesis/hypoplasia syndrome
- Mayer-Rokitansky-Küster-Hauser syndrome type 1
- Mayer-Rokitansky-Küster-Hauser syndrome type 2
- Meckel syndrome
- Megacystis-microcolon-intestinal hypoperistalsis syndrome
- Menke-Hennekam syndrome
- Multicentric carpo-tarsal osteolysis with nephropathy
- Multinucleated neurons-anhydramnios-renal dysplasia-cerebellar hypoplasia-hydranencephaly syndrome
- Nephrosis-deafness-urinary tract-digital malformations syndrome

- Neurofaciodigitorenal syndrome
- Noonan syndrome
- NPHP3-related Meckel-like syndrome
- Ochoa syndrome
- Orofaciodigital syndrome type 1
- Pallister-Hall syndrome
- Renal cysts and diabetes syndrome
- Renal caliceal diverticuli-deafness syndrome
- Renal coloboma syndrome
- Renal nutcracker syndrome
- Rubinstein-Taybi syndrome due to 16p13.3 microdeletion
- Rubinstein-Taybi syndrome due to CREBBP mutations
- Rubinstein-Taybi syndrome due to EP300 haploinsufficiency
- Schinzel-Giedion syndrome
- SERKAL syndrome
- SETD2-related microcephaly-severe intellectual disability-multiple congenital anomalies syndrome
- Simpson-Golabi-Behmel syndrome
- Smith-Lemli-Opitz syndrome
- Spastic paraplegia-nephritis-deafness syndrome
- Tall stature-intellectual disability-renal anomalies syndrome
- Thomas syndrome
- Thymic-renal-anal-lung dysplasia
- Thyrocerebrorenal syndrome
- Townes-Brocks syndrome
- Trisomy 13
- Trisomy 18
- Turner syndrome
- Monosomy X
- Mosaic monosomy X
- Turner syndrome due to structural X chromosome anomalies
- Ulbright-Hodes syndrome
- VACTERL/VATER association
- WAGR syndrome

#### **10. Thrombotic Microangiopathy**

- De novo thrombotic microangiopathy after kidney transplantation
- Atypical hemolytic uremic syndrome with anti-factor H antibodies
- Atypical hemolytic uremic syndrome with complement gene abnormality
  - Complement factor H, I, 3, 4A deficiency
- Atypical hemolytic uremic syndrome not otherwise specified
- Hemolytic uremic syndrome with DGKE deficiency
- Infection-related hemolytic uremic syndrome
- Shiga toxin-associated hemolytic uremic syndrome
- Streptococcus pneumoniae-associated hemolytic uremic syndrome
- Methylmalonic acidemia with homocystinuria, type cblC
- Pediatric systemic lupus erythematosus
- Systemic lupus erythematosus associated TMA
- Thrombotic thrombocytopenic purpura
- Congenital thrombotic thrombocytopenic purpura
- Immune-mediated thrombotic thrombocytopenic purpura
- Acquired thrombotic thrombocytopenic purpura

## 11. Genetic diseases/ syndromes with kidney involvement: Groopman E list

- Coenzyme q10 deficiency
- Coloboma, ocular` with or without hearing impairment, cleft lip palate, and or mental retardation
- Coffin Siris syndrome
- Cockayne syndrome
- Chondroplasia Punctata syndrome
- Cardiofaciocutaneous syndrome
- Burn-McKeown syndrome
- Blackfan-Diamond anemia
- Adrenal hypoplasia, congenital, with hypogonadotropic hypogonadism
- Alkaptonuria
- Adrenal hypoplasia, congenital, with hypogonadotropic hypogonadism
- Alagille syndrome type 1
- Alkaptonuria
- Acro-renal-ocular syndrome, Duane-Radial Ray Syndrome IVIC Syndrome
- 5-oxoprolinase deficiency
- Arthrogyposis, renal dysfunction, and cholestasis 2` arcs2
- Atypical Werner syndrome Laminopathy type Decaudain-Vigouroux LMNA-related cardiocutaneous progeria syndrome, Restrictive Dermopathy, Lethal
- Autoimmune Disease, multisystem, infantileJonset, 2
- Autoimmune interstitial lung, joint, and kidney disease
- Autoimmune Lymphoproliferative syndrome type 2A
- Autosomal dominant periodic fever syndrome
- Autosomal recessive polycystic kidney disease, Polycystic and hepatic disease
- Autosomal recessive spondylocostal dysostosis
- Hypotrichosis-lymphedema-telangiectasia-renal defect syndrome
- Hypouricemia, renal, 1, rhuc1
- Hypouricemia, renal, 2
- IFAP Syndrome with or without Bresheck Syndrome
- Immunodeficiency 23
- Immunodeficiency-centromeric instability, facial anomalies syndrome 1, icf1
- Immunodeficiency, common variable, 3,6
- Hypomagnesemia associated with myokymia
- Hypomagnesemia type 6 Hypomagnesemia, seizures, and mental retardation
- Hypoparathyroidism-retardation-dysmorphism syndrome` Kenny-Caffey syndrome, type 1
- Hypoparathyroidism, deafness, renal disease syndrome
- Hereditary hemorrhagic telangiectasia
- Hereditary orotic aciduria
- Hermansky-Pudlak syndrome 1
- HERNS syndrome` Vasculopathy, retinal, with cerebral leukodystrophy
- Hydroletharus syndrome
- Hydroxykynureninuria
- Hyperaldosteronism,familial,type 3
- Hypercalcemia infantile, 1
- Hyperglycinuria
- GM1-gangliosidosis, type 1, type 2
- Hand-foot-uterus syndrome
- Hartnup Disorder Hyperglycinuria
- Hemorrhagic destruction of the brain, subependymal calcification, and cataracts

- Hennekam Lymphangiectasia-Lymphedema Syndrome
- Hereditary angiopathy with nephropathy, aneurysms and Muscle cramps (HANAC)
- Glomerulopathy with fibronectin deposits 2
- Glomerulosclerosis, focal segmental, 6
- Glutaric acidemia 2b
- Glutaric acidemia 2c
- Glutaric aciduria 2a
- Glutaric aciduria 3
- Glutaricaciduria, type I
- Galloway-Mowat syndrome
- Gaucher disease
- Genitopatellar syndrome
- Gillissen-Kaesbach-Nishimura syndrome (GIKANIS), Congenital disorder of glycosylation, type 2
- Focal Segmental Glomerulosclerosis 5 Charcot-Marie-Tooth disease E
- Fanconi anemia, complementation group a
- Fanconi anemia, complementation group b
- Fanconi anemia, complementation group c
- Fanconi anemia, Complementation group d2
- Fanconi anemia, complementation group e
- Fanconi anemia, complementation group I
- Fanconi anemia, complementation group L
- Fanconi Anemia, Complementation Group N
- Fanconi anemia, complementation group O
- Fanconi anemia, complementation group P
- Fanconi anemia, Xeroderma pigmentosum, type f, Cockayne syndrome
- Fanconi renal tubular syndrome 2 hypercalcemia, infantile, 2 nephrolithiasis, osteoporosis, hypophosphatemic, 1
- Fanconi renal tubular syndrome 3
- Fanconi-Bickel syndrome
- Fechtner syndrome` Epstein Syndrome
- Feingold syndrome
- Feingold syndrome 2` Brachydactyly with short stature and microcephaly
- Floating-Harbor syndrome
- Focal dermal hypoplasia
- Diaphanospondylodysostosis
- Diarrhea 3, secretory sodium, congenital, syndromic
- Dicarboxylic aminoaciduria
- Donnai-Barrow syndrome
- DOOR syndrome
- Dyskeratosis congenita
- Dyskeratosis congenita
- Dyskeratosis Congenita, X-linked
- EEC syndrome, Ectrodactyly, ectodermal dysplasia, and cleft lip, palate syndrome 3
- Ehlers-Danlos syndrome with progressive kyphoscoliosis, myopathy, and hearing loss
- Ehlers-Danlos syndrome, classic type
- Ehlers-Danlos syndrome, musculocontractural type 1
- Ehlers-Danlos syndrome, type 6
- Ellis Van Creveld syndrome
- Ellis Van Creveld syndrome
- Encephalocraniocutaneous Lipomatosis, Kallmann syndrome 2, kal2
- Endocrine-cerebroosteodysplasia

- Epidermolysis bullosa, junctional, Herlitz type` Epidermolysis bullosa, junctional, non-Herlitz type
- Epidermolysis bullosa, junctional, with pyloric atresia
- Epilepsy, Progressive Myoclonic, 4 with or without Renal Failure
- Even-plus syndrome
- Fabry Disease
- Familial dysautonomia, Hereditary sensory and autonomic neuropathy type 3, hsan3
- Familial Mediterranean fever
- Developmental delay with short stature, dysmorphic features, and sparse hair
- Diabetes mellitus, insulin-dependent, 20` MODY, type 3` Renal cell carcinoma
- Costello syndrome
- Cowden syndrome
- Cranioectodermal dysplasia type 1
- Cranioectodermal dysplasia type 3
- Craniofacial dysmorphism, skeletal anomalies, and mental retardation syndrome
- Currarino syndrome
- Cushing syndrome due to macronodular adrenal hyperplasia
- Cutis laxa type 1, 1A, 1C
- Cystinosis, nephropathic cystinosis, late-onset Juvenile or adolescent nephropathic
- Cystinuria
- D-bifunctional protein deficiency
- Infantile myofibromatosis, Cerebral arteriopathy with subcortical infarcts and leukoencephalopathy 1, Lateral meningocele syndrome
- Interstitial lung disease, nephrotic syndrome, and epidermolysis bullosa, congenital
- Interstitial nephritis, karyomegalic
- Johanson-Blizzard syndrome
- Joubert syndrome 16
- Joubert syndrome 18, Orofaciodigital syndrome 4
- Joubert syndrome 2, Meckel syndrome
- Joubert syndrome 25
- Joubert Syndrome 3
- Joubert syndrome type 10, Orofaciodigital syndrome I, Golabi-Behmel syndrome, type 2
- Joubert syndrome type 14
- Joubert syndrome type 20, meckel-gruber syndrome type 11
- Joubert syndrome with hepatic defect, Joubert syndrome with oculorenal defect, Meckel Syndrome 6, Joubert syndrome 9, COACH syndrome
- Joubert syndrome with hepatic defect Joubert Syndrome 1
- Joubert syndrome with oculorenal defect, BardetBjiedl syndrome 14, Joubert Syndrome 5, Meckel syndrome 4, SeniorJLoken Syndrome 6
- Joubert's syndrome type 15
- Joubert's syndrome type 22
- Junctional epidermolysis bullosa-pyloric atresia syndrome, Epidermolysis bullosa, junctional, with pyloric stenosis
- Kabuki syndrome
- Kabuki syndrome
- Kabuki syndrome
- Kabuki syndrome 1
- Kallmann syndrome 3, kal3 (hypogonadotropic hypogonadism 3 with or without anosmia)
- Kelley-Seegmiller Syndrome Lesch-Nyhan Syndrome
- Knobloch syndrome
- Koolen-De Vries Syndrome
- Lacrimoauriculodentodigital syndrome

- Lathosterolosis
- Laurence-Moon syndrome
- Lethal congenital contracture syndrome 2
- Lethal neonatal carnitine palmitoyltransferase 2 deficiency
- Liddle syndrome
- Linear skin defects with multiple congenital anomalies 2
- Lipodystrophy congenital generalized, type 1
- Lipodystrophy congenital generalized, type 2
- Lipoid adrenal hyperplasia
- Loeys-Dietz syndrome 3
- Lymphedema-distichiasis syndrome with renal disease and diabetes mellitus
- Lymphedema, hereditary, IA
- Lysinuric protein intolerance
- Macrocephaly, alopecia, cutis laxa, and scoliosis
- Mandibulofacial dysostosis with alopecia
- Marden-Walker Syndrome
- McArdle Disease
- Meckel syndrome 1, Bardet-Biedl syndrome 13
- Meckel syndrome 12
- Meckel syndrome 5, Joubert syndrome 7, COACH syndrome
- Meckel syndrome type 10
- Meckel syndrome, Joubert syndrome 21
- Meckel syndrome` Meckel-Gruber syndrome type 9
- Meckel-gruber syndrome type 8, -oubert syndrome 24
- Medullary cystic kidney disease 1
- Medullary cystic kidney disease 2 hyperuricemic nephropathy glomerulocystic kidney disease
- Megacystis-microcolon-intestinal hypoperistalsis syndrome, Visceral myopathy
- Megalencephaly-polymicrogyria-polydactyly-hydrocephalus syndrome 1
- Megaloblastic anemia 1-finnish type
- Megaloblastic anemia 1-norwegian\_type
- Mental retardation, autosomal dominant 42
- Mental retardation, autosomal dominant, 27
- Mental retardation, x-linked 90
- Mental retardation, X-linked 99, syndromic, female-restricted
- Mental retardation, Xlinked 98
- Metachromatic leukodystrophy due to SAP-b deficiency
- Metaphyseal chondrodysplasia, Murk Jansen type
- Methylmalonic aciduria and homocystinuria, cbl- type
- Methylmalonic aciduria and homocystinuria, cblc type
- Methylmalonic aciduria and homocystinuria, cblF type
- Mevalonic aciduria
- Micro syndrome
- Microcephalic osteodysplastic primordial dwarfism, type I
- Microcephaly, short stature, and impaired glucose metabolism 2
- Microphthalmia with limb anomalies
- Microphthalmia, Lenz type, Microphthalmia, syndromic 1
- Microphthalmia, Lenz type` Microphthalmia, syndromic 2
- Microphthalmia, syndromic 6
- Microphthalmia, syndromic 9, mcops9
- Microcephaly, short stature, and polymicrogyria with or without seizures
- Mitochondrial Complex 4 deficiency

- Mitochondrial complex 3 deficiency, nuclear type 1
- Mitochondrial complex 3 deficiency, nuclear type 7
- Mitochondrial Complex 4 deficiency
- Mitochondrial DNA depletion syndrome 13
- Mitochondrial DNA depletion syndrome 8A
- Mitochondrial dna depletion syndrome, encephalomyopathic form, with methylmalonic aciduria
- Mosaic variegated aneuploidy syndrome 1
- Muckle-wells syndrome Familial cold-induced inflammatory syndrome 1
- Muir-Torre syndrome colorectal cancer, hereditary, nonpolyposis, type 1
- Multicentric carpo-tarsal osteolysis with or without nephropathy
- Multiple congenital anomalies-hypotonia-seizures syndrome 1,2,3
- Multiple endocrine neoplasia, type 4
- Multisystemic smooth muscle dysfunction syndrome
- Muscular dystrophy-dystroglycanopathy (congenital with brain and eye anomalies), type A, 13
- Muscular dystrophy-dystroglycanopathy, type A, 1
- Myoglobinuria, acute recurrent
- Myotubular myopathy
- Nager syndrome, Acrofacial dysostosis 1, Nager type
- Nail-patella syndrome
- Neonatal severe primary hyperparathyroidism` Hypocalcemia with Bartter syndrome
- Nephrogenic syndrome of inappropriate diuresis Diabetes insipidus, nephrogenic
- Nephrolithiasis,osteoporosis, hypophosphatemic, 2
- Nephronophthisis 1 - 19
- Nephronophthisis 4 Senior-Loken syndrome 4
- NephronophthisisJ14 Joubert syndrome 16
- Meckel Syndrome 3, Joubert syndrome 6, COACH syndrome
- Nephronophthisis, Joubert syndrome 8
- Nephropathy due to CFHR5 deficiency
- Nephropathy with pretibial epidermolysis bullosa and deafness
- Neu-Laxova syndrome 1
- Neurodevelopmental disorder with or without anomalies of the brain, eye, or heart
- Neurofibromatosis, type I
- Nijmegen breakage syndrome
- Noonan syndrome with multiple lentigines, Cardiofaciocutaneous syndrome
- Noonan syndrome with multiple lentigines Leopard syndrome 1
- Norum disease
- Obesity, adrenal insufficiency, and red hair due to POMC deficiency
- Occipital horn syndrome
- Ochoa syndrome, Urofacial Syndrome 1,2
- Opitz GBBB syndrome, type 2
- Opsismodysplasia
- Orofacial cleft 15
- Orofaciodigital syndrome 5,6
- Pendred syndrome
- Perlman's syndrome (nephroblastomatosis, gigantism)
- Peters-plus syndrome
- Peutz--eghers syndrome
- Pfeiffer syndrome type 3, Antley-Bixler syndrome, Apert syndrome, LADD syndrome
- Pheochromocytoma Cowden syndrome 3
- Phosphoglycerate kinase 1 deficiency

- Phosphoribosylpyrophosphate Synthetase Syperactivity
- Plasminogen deficiency, Type I
- Polycystic kidney disease 1
- Polycystic liver disease 3 with or without kidney cysts
- Polyhydramnios, megalencephaly, and symptomatic epilepsy
- Popliteal pterygium syndrome, Bartsocas-Papas type
- Proud syndrome
- Prune belly syndrome, Eagle-barrett syndrome
- Rabson-Mendenhall syndrome
- Raine syndrome
- Renal agenesis, bilateral
- Renal coloboma syndrome, FSGS 7, Papillorenal Syndrome, PAPRS
- Renal Cysts and Diabetes Syndrome
- Renal cysts and diabetes syndrome` Hyperinsulinism due to HNF4A deficiency` Fanconi renotubular syndrome 4, with maturity-onset diabetes of the young
- Renal glucosuria
- Renpenning Syndrome 1
- Restrictive Dermopathy, Lethal
- Roberts syndrome
- Robinow syndrome
- Robinow syndrome, autosomal dominant 1
- Rubinstein Taybi syndrome type 1
- Scalp-Ear-Nipple Syndrome
- Schimke immuno-osseous dysplasiaSchimke's immunoosseous dystrophy
- Schinzel-Giedion Midface Retraction Syndrome
- Schwartz--ampel syndrome
- Seckel Syndrome 2
- Seckel syndrome 8
- Seckel syndrome 9
- Seizures, sensorineural deafness, ataxia, mental retardation, and electrolyte imbalance (sesame syndrome)
- Senior loken syndrome type 7, Bardet-Biedl Syndrome 16
- Senior-loken syndrome 5
- Senior-Loken syndrome 9
- Senior-Loken syndrome, Nephronophthisis 2, infantile
- Senior-Loken syndrome, Nephronophthisis 3 (adolescent), Meckel syndrome 7, Renal-hepatic-pancreatic dysplasia
- Senior-Loken syndrome, Nephronophthisis 15
- Senior-Loken syndrome, Short-rib thoracic dysplasia 5, Nephronophthisis type 13, Cranioectodermal dysplasia
- SERKAL syndrome Mullerian aplasia and hyperandrogenism
- Short rib-polydactyly syndrome (-eune's syndrome) type 9
- Short rib-polydactyly syndrome, Verma-Naumoff type
- Short rib-polydactyly syndrome, Verma-Naumoff type, Short rib-polydactyly syndrome (-eune's syndrome) type 3
- Short rib-polydactyly syndrome, Verma-Naumoff type, Short rib-polydactyly syndrome (-eune's syndrome) type 7,Cranioectodermal dysplasia type 2
- Short rib-polydactyly syndrome, Verma-Naumoff type, Short rib-polydactyly syndrome (-eune's syndrome) type 8
- Short rib-polydactyly syndrome, Verma-Naumoff typeShort-rib thoracic dysplasia 11 with or without polydactyly
- Short ribJpolydactyly syndrome (Jeune's syndrome) type 6



- Short stature, microcephaly, and endocrine dysfunction
- Short-rib thoracic dysplasia 13 with or without polydactyly
- Shwachman-Diamond syndrome
- Sickle Cell Anemia beta-thalassemia, dominant inclusion body type
- Sideroblastic anemia with B-cell immunodeficiency, periodic fevers, and developmental delay
- Simpson golabi behmel syndrome type 1
- Single median maxillary central incisor holoprosencephaly 3
- Smith-Lemli-Opitz Syndrome
- Smith-Magenis syndrome Yuan-Harel-Lupski syndrome
- Sneddon syndrome Polyarteritis nodosa, childhood-onset
- Sotos syndrome
- Sotos syndrome 1` Beckwith-Wiedemann syndrome, BWS
- Spinocerebellar ataxia, autosomal recessive 16
- Spondylocarpotarsal synostosis syndrome
- Spondylocular syndrome
- Spondyloenchondrodysplasia with immune dysregulation
- STAR (toe Syndactyly, Telecanthus, and Anogenital and Renal Malformations)
- Stromme syndrome
- Sucrase-isomaltase deficiency, congenital
- Symmetric circumferential skin creases congenital, 2
- TARP syndrome
- Tetraamelia-multiple malformations syndrome
- Thanatophoric dysplasia type 1, Thanatophoric dysplasia type 2, Lacrimoauriculodigital syndrome
- Thrombocytopenia-absent radius syndrome
- Thrombotic thrombocytopenic purpura, familial
- TMEM70-related mitochondrial encephalo-cardio-myopathy
- Townes-Brocks Branchiootorenal-like Syndrome
- Trichohepatenteric syndrome 1
- Tuberous Sclerosis-1,2
- Tumoral calcinosis, hyperphosphatemic, familial, hftc
- tyrosinemia, type 1
- Ulna and fibula, absence of, with severe limb deficiency
- Vacterl association with hydrocephalus
- VACTERL association, Xlinked Heterotaxy, visceral, 1
- Van Maldergem syndrome 1
- Van Maldergem Syndrome 2 Hennekam lymphangiectasia-lymphedema syndrome 2
- Verheij syndrome
- Vesicoureteral Reflux 8 Ehlers-Danlos syndrome due to tenascin-X deficiency
- Vici syndrome
- Vitamin B12-unresponsive methylmalonic acidemia type mut0
- Von Hippel-Lindau Syndrome
- Webb-Dattani syndrome
- Wilson Disease
- Wiskott-Aldrich syndrome
- Wolcott-Rallison Syndrome
- Wolfram syndrome 2
- Wolfram syndrome type 1

**Table S1 – Search strategy for Medline**

|        | Search terms                                                                                                                                                                                                                                                                                                                                                                                                                                                                                                                                                                                                                                                                                                                                                                                                                                                                                                                                                                                                                                                                                                                                                                                                                                                                                                                                                                                                                                                                                                                                                                                                                                                                                                                                                                                                                                                                                                                                                                                                                                                                                                                                                                                                                                                                                                                                                                                                                                                                                                                                                                                                                                                                                                                                                                                                                                                                                                           | No<br>of<br>hits |
|--------|------------------------------------------------------------------------------------------------------------------------------------------------------------------------------------------------------------------------------------------------------------------------------------------------------------------------------------------------------------------------------------------------------------------------------------------------------------------------------------------------------------------------------------------------------------------------------------------------------------------------------------------------------------------------------------------------------------------------------------------------------------------------------------------------------------------------------------------------------------------------------------------------------------------------------------------------------------------------------------------------------------------------------------------------------------------------------------------------------------------------------------------------------------------------------------------------------------------------------------------------------------------------------------------------------------------------------------------------------------------------------------------------------------------------------------------------------------------------------------------------------------------------------------------------------------------------------------------------------------------------------------------------------------------------------------------------------------------------------------------------------------------------------------------------------------------------------------------------------------------------------------------------------------------------------------------------------------------------------------------------------------------------------------------------------------------------------------------------------------------------------------------------------------------------------------------------------------------------------------------------------------------------------------------------------------------------------------------------------------------------------------------------------------------------------------------------------------------------------------------------------------------------------------------------------------------------------------------------------------------------------------------------------------------------------------------------------------------------------------------------------------------------------------------------------------------------------------------------------------------------------------------------------------------------|------------------|
| #<br>1 | (Costs and Cost Analysis[MeSH Terms] OR "cost-minimisation"[title/abstract] OR "cost-minimization"[title/abstract] OR "health technology assessment"[Title/Abstract] OR "cost-effectiveness"[Title/Abstract] OR "cost-utility"[Title/Abstract] OR "cost analysis"[title/abstract] OR "budget impact"[Title/Abstract] OR "cost-benefit"[Title/Abstract])                                                                                                                                                                                                                                                                                                                                                                                                                                                                                                                                                                                                                                                                                                                                                                                                                                                                                                                                                                                                                                                                                                                                                                                                                                                                                                                                                                                                                                                                                                                                                                                                                                                                                                                                                                                                                                                                                                                                                                                                                                                                                                                                                                                                                                                                                                                                                                                                                                                                                                                                                                | 31<br>1,9<br>92  |
| #<br>2 | ((((((((("Shwachman-Diamond syndrome"[Title/Abstract] OR "Sickle Cell Anemia beta-thalassemia"[Title/Abstract] OR "Simpson golabi behmel syndrome type 1"[Title/Abstract] OR "Smith-Lemli-Opitz Syndrome"[Title/Abstract] OR "Sotos syndrome"[Title/Abstract] OR "Spondylocarpotarsal synostosis syndrome"[Title/Abstract] OR "Spondyloenchondrodysplasia with immune dysregulation"[Title/Abstract] OR "toe Syndactyly"[Title/Abstract] OR "Stromme syndrome"[Title/Abstract] OR "TARP syndrome"[Title/Abstract] OR "Thrombocytopenia-absent radius syndrome"[Title/Abstract] OR "Thrombotic thrombocytopenic purpura"[Title/Abstract] OR "Tuberous Sclerosis"[Title/Abstract] OR "tyrosinemia type 1"[Title/Abstract] OR "Vacterl association with hydrocephalus"[Title/Abstract] OR "Verheij syndrome"[Title/Abstract] OR "Vici syndrome"[Title/Abstract] OR "Von Hippel-Lindau Syndrome"[Title/Abstract] OR "Wilson Disease"[Title/Abstract] OR "Wiskott-Aldrich syndrome"[Title/Abstract] OR "Wolcott-Rallison Syndrome"[Title/Abstract] OR "Wolfram syndrome 2"[Title/Abstract] OR "Wolfram syndrome type 1"[Title/Abstract]) OR ("Microphthalmia with limb anomalies"[Title/Abstract] OR "Microphthalmia syndromic 9"[Title/Abstract] OR "Mitochondrial DNA depletion syndrome 13"[Title/Abstract] OR "Mitochondrial DNA depletion syndrome 8A"[Title/Abstract] OR "Mitochondrial dna depletion syndrome encephalomyopathic form with methylmalonic aciduria"[Title/Abstract] OR "Multiple endocrine neoplasia type 4"[Title/Abstract] OR "Multisystemic smooth muscle dysfunction syndrome"[Title/Abstract] OR "Muscular dystrophy-dystroglycanopathy"[Title/Abstract] OR "Myotubular myopathy"[Title/Abstract] OR "Nail-patella syndrome"[Title/Abstract] OR "Neurofibromatosis type I"[Title/Abstract] OR "Nijmegen breakage syndrome"[Title/Abstract] OR "Norum disease"[Title/Abstract] OR "Occipital horn syndrome"[Title/Abstract] OR "Opsismodysplasia"[Title/Abstract] OR "Pendred syndrome"[Title/Abstract] OR "Peters-plus syndrome"[Title/Abstract] OR "Phosphoglycerate kinase 1 deficiency"[Title/Abstract] OR "Plasminogen deficiency Type I"[Title/Abstract] OR "Polycystic kidney disease 1"[Title/Abstract] OR "Polyhydramnios"[Title/Abstract] OR "Popliteal pterygium syndrome"[Title/Abstract] OR "Proud syndrome"[Title/Abstract] OR "Rabson-Mendenhall syndrome"[Title/Abstract] OR "Raine syndrome"[Title/Abstract] OR "Renal agenesis bilateral"[Title/Abstract] OR "Renal glucosuria"[Title/Abstract] OR "Roberts syndrome"[Title/Abstract] OR "Robinow syndrome"[Title/Abstract] OR "Scalp-Ear-Nipple Syndrome"[Title/Abstract] OR "sesame syndrome"[Title/Abstract])) OR ("EEC syndrome"[Title/Abstract] OR "Ectrodactyly ectodermal dysplasia and cleft lip palate syndrome 3"[Title/Abstract] OR "Ehlers-Danlos syndrome classic type"[Title/Abstract] OR "Ehlers-Danlos syndrome | 33<br>2,8<br>61  |

musculocontractural type 1"[Title/Abstract] OR "Ehlers-Danlos syndrome type 6"[Title/Abstract] OR "Ellis Van Creveld syndrome"[Title/Abstract] OR "Endocrine-cerebroosteodysplasia"[Title/Abstract] OR "Epidermolysis bullosa junctional"[Title/Abstract] OR "Even-plus syndrome"[Title/Abstract] OR "Fabry Disease"[Title/Abstract] OR "Costello syndrome"[Title/Abstract] OR "Cowden syndrome"[Title/Abstract] OR "Currarino syndrome"[Title/Abstract] OR "Cystinuria"[Title/Abstract] OR "D-bifunctional protein deficiency"[Title/Abstract] OR "Infantile myofibromatosis"[Title/Abstract] OR "Lateral meningocele syndrome"[Title/Abstract] OR "Johanson-Blizzard syndrome"[Title/Abstract] OR "Orofaciodigital syndrome 4"[Title/Abstract] OR "Joubert syndrome 2"[Title/Abstract] OR "Meckel syndrome"[Title/Abstract] OR "Joubert Syndrome 3"[Title/Abstract] OR "Joubert syndrome type 10"[Title/Abstract] OR "Kabuki syndrome"[Title/Abstract] OR "Kabuki syndrome 1"[Title/Abstract] OR "Kallmann syndrome 3"[Title/Abstract] OR "Knobloch syndrome"[Title/Abstract] OR "Koolen-De Vries Syndrome"[Title/Abstract] OR "Lacrimoauriculodentodigital syndrome"[Title/Abstract] OR "Lathosterolosis"[Title/Abstract] OR "Laurence-Moon syndrome"[Title/Abstract] OR "Liddle syndrome"[Title/Abstract] OR "Lipoid adrenal hyperplasia"[Title/Abstract] OR "Loeys-Dietz syndrome 3"[Title/Abstract] OR "Lysinuric protein intolerance"[Title/Abstract] OR "Macrocephaly alopecia cutis laxa and scoliosis"[Title/Abstract] OR "Marden-Walker Syndrome"[Title/Abstract] OR "McArdle Disease"[Title/Abstract] OR "Medullary cystic kidney disease 1"[Title/Abstract] OR "Methylmalonic aciduria and homocystinuria cblc type"[Title/Abstract] OR "Methylmalonic aciduria and homocystinuria cblF type"[Title/Abstract] OR "Mevalonic aciduria"[Title/Abstract] OR "Micro syndrome"[Title/Abstract] OR "Microcephalic osteodysplastic primordial dwarfism type I"[Title/Abstract])) OR ("Autosomal dominant polycystic kidney disease"[Title/Abstract] OR "Autosomal dominant tubulointerstitial kidney disease"[Title/Abstract] OR "Autosomal recessive polycystic kidney disease"[Title/Abstract] OR "Bardet-Biedl syndrome"[Title/Abstract] OR "Cranioectodermal dysplasia"[Title/Abstract] OR "Ellis Van Creveld syndrome"[Title/Abstract] OR "Karyomegalic interstitial nephritis"[Title/Abstract] OR "Meckel syndrome"[Title/Abstract] OR "Nephronophthisis"[Title/Abstract] OR "Renal-hepatic-pancreatic dysplasia"[Title/Abstract] OR "RHYNS syndrome"[Title/Abstract] OR "Saldino-Mainzer syndrome"[Title/Abstract] OR "Senior-Loken syndrome"[Title/Abstract] OR "Tuberous sclerosis complex"[Title/Abstract] OR "Von Hippel-Lindau disease"[Title/Abstract] OR "Alport syndrome"[Title/Abstract] OR "HANAC syndrome"[Title/Abstract] OR "Action myoclonus-renal failure syndrome"[Title/Abstract] OR "Denys-Drash syndrome"[Title/Abstract] OR "Frasier syndrome"[Title/Abstract] OR "Galloway-Mowat syndrome"[Title/Abstract] OR "MYH9-related disease"[Title/Abstract] OR "Nail-patella-like renal disease"[Title/Abstract] OR "Nail-patella syndrome"[Title/Abstract] OR "Pierson syndrome"[Title/Abstract] OR "Schimke immuno-osseous dysplasia"[Title/Abstract] OR "Genetic nephrotic syndrome"[Title/Abstract] OR "Congenital nephrotic syndrome"[Title/Abstract] OR "Finnish type"[Title/Abstract] OR "Genetic steroid-resistant nephrotic syndrome"[Title/Abstract] OR "Idiopathic nephrotic syndrome"[Title/Abstract] OR "Primary membranoproliferative glomerulonephritis"[Title/Abstract] OR "C3 glomerulopathy"[Title/Abstract] OR "C3 glomerulonephritis"[Title/Abstract] OR "Dense deposit disease"[Title/Abstract] OR "Immunoglobulin-mediated membranoproliferative glomerulonephritis"[Title/Abstract] OR "Primary membranous glomerulonephritis"[Title/Abstract] OR "Familial Mediterranean fever"[Title/Abstract] OR "Fibronectin glomerulopathy"[Title/Abstract] OR "AApoA1 amyloidosis"[Title/Abstract] OR "AApoAII amyloidosis"[Title/Abstract] OR "AFib amyloidosis"[Title/Abstract] OR "ALys amyloidosis"[Title/Abstract] OR "Hypocomplementemic urticarial vasculitis"[Title/Abstract] OR "Lipoprotein glomerulopathy"[Title/Abstract] OR "Muckle-Wells syndrome"[Title/Abstract] OR "AA amyloidosis"[Title/Abstract] OR "AApoAIV amyloidosis"[Title/Abstract] OR "Adult-onset Still disease"[Title/Abstract] OR "AH amyloidosis"[Title/Abstract] OR "AL amyloidosis"[Title/Abstract] OR "Behçet disease"[Title/Abstract] OR "Collagen type III glomerulopathy"[Title/Abstract] OR "Dermatomyositis"[Title/Abstract] OR "IgG4-related kidney disease"[Title/Abstract] OR "Immunotactoid"[Title/Abstract] OR "fibrillary glomerulopathy"[Title/Abstract] OR "Immunotactoid glomerulopathy"[Title/Abstract] OR "Juvenile dermatomyositis"[Title/Abstract]

OR "Juvenile polymyositis"[Title/Abstract] OR "Mixed connective tissue disease"[Title/Abstract])) OR ("Heavy chain deposition disease"[Title/Abstract] OR "Light and heavy chain deposition disease"[Title/Abstract] OR "Polymyositis"[Title/Abstract] OR "Reynolds syndrome"[Title/Abstract] OR "Sarcoidosis"[Title/Abstract] OR "Systemic sclerosis"[Title/Abstract] OR "Diffuse cutaneous systemic sclerosis"[Title/Abstract] OR "Limited cutaneous systemic sclerosis"[Title/Abstract] OR "Limited systemic sclerosis"[Title/Abstract] OR "Anti-glomerular basement membrane disease"[Title/Abstract] OR "Buerger disease"[Title/Abstract] OR "Cryoglobulinemic vasculitis"[Title/Abstract] OR "Mixed cryoglobulinemia type II"[Title/Abstract] OR "Eosinophilic granulomatosis with polyangiitis"[Title/Abstract] OR "Giant cell arteritis"[Title/Abstract] OR "Granulomatosis with polyangiitis"[Title/Abstract] OR "Immunoglobulin A vasculitis"[Title/Abstract] OR "Microscopic polyangiitis"[Title/Abstract] OR "Pauci-immune glomerulonephritis"[Title/Abstract] OR "Pediatric systemic lupus erythematosus"[Title/Abstract] OR "Polyarteritis nodosa"[Title/Abstract] OR "Cutaneous polyarteritis nodosa"[Title/Abstract] OR "Systemic polyarteritis nodosa"[Title/Abstract] OR "Relapsing polychondritis"[Title/Abstract] OR "Systemic lupus erythematosus"[Title/Abstract] OR "Takayasu arteritis"[Title/Abstract] OR "Beta thalassemia"[Title/Abstract] OR "Beta thalassemia intermedia"[Title/Abstract] OR "Beta thalassemia major"[Title/Abstract] OR "Dominant beta thalassemia"[Title/Abstract] OR "Fanconi anemia"[Title/Abstract] OR "Sickle cell anemia"[Title/Abstract] OR "Beckwith Wiedemann syndrome"[Title/Abstract] OR "Birt-Hogg-Dube syndrome"[Title/Abstract] OR "Hereditary leiomyomatosis and renal cell cancer"[Title/Abstract] OR "Hereditary papillary renal cell carcinoma"[Title/Abstract] OR "Hyperparathyroidism- jaw tumor syndrome"[Title/Abstract] OR "Perlman syndrome"[Title/Abstract] OR "Tuberous sclerosis complex"[Title/Abstract] OR "Von Hippel-Lindau disease"[Title/Abstract] OR "WAGR syndrome"[Title/Abstract] OR "Adenine phosphoribosyltransferase deficiency"[Title/Abstract] OR "Alkaptonuria"[Title/Abstract] OR "Alpha-1-antitrypsin deficiency"[Title/Abstract] OR "ALG8-CDG"[Title/Abstract] OR "Musculocontractural Ehlers-Danlos syndrome"[Title/Abstract] OR "SLC35A1-CDG"[Title/Abstract] OR "Dent disease"[Title/Abstract] OR "Enamel-renal syndrome"[Title/Abstract] OR "Fabry disease"[Title/Abstract] OR "Familial renal glucosuria"[Title/Abstract] OR "Fanconi-Bickel syndrome"[Title/Abstract] OR "Galactosemia"[Title/Abstract] OR "Classic galactosemia"[Title/Abstract] OR "Galactokinase deficiency"[Title/Abstract] OR "Galactose epimerase deficiency"[Title/Abstract] OR "Hartnup disease"[Title/Abstract] OR "Hereditary fructose intolerance"[Title/Abstract] OR "Hereditary xanthinuria"[Title/Abstract] OR "Xanthinuria type I"[Title/Abstract] OR "Xanthinuria type II"[Title/Abstract] OR "Hypoxanthine-guanine phosphoribosyltransferase deficiency"[Title/Abstract] OR "Lesch-Nyhan syndrome"[Title/Abstract] OR "Imerslund-Grasbeck syndrome"[Title/Abstract] OR "Infantile nephropathic cystinosis"[Title/Abstract] OR "Juvenile nephropathic cystinosis"[Title/Abstract] OR "LCAT deficiency"[Title/Abstract] OR "Familial LCAT deficiency"[Title/Abstract] OR "Fish-eye disease"[Title/Abstract])) OR ("Lowe Syndrome"[Title/Abstract] OR "Lysinuric protein intolerance"[Title/Abstract] OR "Phosphoribosylpyrophosphate synthetase superactivity"[Title/Abstract] OR "Porphyria"[Title/Abstract] OR "Acute hepatic porphyria"[Title/Abstract] OR "Acute intermittent porphyria"[Title/Abstract] OR "Hereditary coproporphyrinuria"[Title/Abstract] OR "Chronic hepatic porphyria"[Title/Abstract] OR "Hepatoerythropoietic porphyria"[Title/Abstract] OR "Porphyria cutanea tarda"[Title/Abstract] OR "Congenital erythropoietic porphyria"[Title/Abstract] OR "Primary hyperoxaluria type 1"[Title/Abstract] OR "Primary hyperoxaluria type 2"[Title/Abstract] OR "Primary hyperoxaluria type 3"[Title/Abstract] OR "Sialidosis type 2"[Title/Abstract] OR "Tyrosinemia type 1"[Title/Abstract] OR "Vitamin B12-responsive methylmalonic acidemia"[Title/Abstract] OR "Vitamin B12-unresponsive methylmalonic acidemia"[Title/Abstract] OR "Wilson disease"[Title/Abstract] OR "Zellweger syndrome"[Title/Abstract] OR "Congenital renal artery stenosis"[Title/Abstract] OR "Apparent mineralocorticoid excess"[Title/Abstract] OR "William syndrome"[Title/Abstract] OR "Pseudoxanthoma elasticum"[Title/Abstract] OR "Liddle syndrome"[Title/Abstract] OR "Familial Hyperaldosteronism"[Title/Abstract] OR "Neurofibromatosis type 1"[Title/Abstract] OR "Pseudohypoadosteronism type 2"[Title/Abstract] OR "Williams

Syndrome"[Title/Abstract] OR "Alstrom syndrome"[Title/Abstract] OR "Bartter syndrome"[Title/Abstract] OR "Cystinuria type A"[Title/Abstract] OR "Cystinuria type B"[Title/Abstract] OR "EAST syndrome"[Title/Abstract] OR "Gitelman syndrome"[Title/Abstract] OR "Hereditary renal hypouricemia"[Title/Abstract] OR "Hypophosphatemic rickets"[Title/Abstract] OR "Autosomal dominant hypophosphatemic rickets"[Title/Abstract] OR "Autosomal recessive hypophosphatemic rickets"[Title/Abstract] OR "Dent disease"[Title/Abstract] OR "Hereditary hypophosphatemic rickets with hypercalciuria"[Title/Abstract] OR "X-linked hypophosphatemia"[Title/Abstract] OR "Hypotonia-cystinuria syndrome"[Title/Abstract] OR "Idiopathic hypercalciuria"[Title/Abstract] OR "Jeune syndrome"[Title/Abstract] OR "Nephrogenic Diabetes insipidus"[Title/Abstract] OR "Oculocerebrorenal syndrome of Lowe"[Title/Abstract] OR "Oncogenic osteomalacia"[Title/Abstract] OR "Primary hypomagnesemia with secondary hypocalcemia"[Title/Abstract] OR "Renal Tubular Acidosis"[Title/Abstract] OR "Proximal renal tubular acidosis"[Title/Abstract] OR "Distal renal tubular acidosis"[Title/Abstract] OR "Osteopetrosis with renal tubular acidosis"[Title/Abstract] OR "Pseudohypoaldosteronism"[Title/Abstract] OR "Tubulointerstitial nephritis and uveitis syndrome"[Title/Abstract] OR "Clear cell sarcoma of kidney"[Title/Abstract] OR "Congenital mesoblastic nephroma"[Title/Abstract] OR "Multiloculated renal cyst"[Title/Abstract] OR "Nephroblastoma"[Title/Abstract] OR "Renal cell carcinoma"[Title/Abstract] OR "Acquired cystic disease - associated renal cell carcinoma"[Title/Abstract])) OR ("Chromophobe renal cell carcinoma"[Title/Abstract] OR "Collecting duct carcinoma"[Title/Abstract] OR "MiT family translocation renal cell carcinoma"[Title/Abstract] OR "Papillary renal cell carcinoma"[Title/Abstract] OR "Renal medullary carcinoma"[Title/Abstract] OR "Tubulocystic renal cell carcinoma"[Title/Abstract] OR "Clear cell renal carcinoma"[Title/Abstract] OR "Clear cell papillary renal cell carcinoma"[Title/Abstract] OR "Multilocular cystic renal neoplasm of low malignant potential"[Title/Abstract] OR "Congenital hydronephrosis"[Title/Abstract] OR "Patent urachus"[Title/Abstract] OR "Urachal cyst"[Title/Abstract] OR "Urachal diverticulum"[Title/Abstract] OR "Urachal sinus"[Title/Abstract] OR "Duplication of urethra"[Title/Abstract] OR "Exstrophy-epispadias complex"[Title/Abstract] OR "Bladder exstrophy"[Title/Abstract] OR "Cloacal exstrophy"[Title/Abstract] OR "Isolated epispadias"[Title/Abstract] OR "Familial vesicoureteral reflux"[Title/Abstract] OR "Anterior urethral valve"[Title/Abstract] OR "Posterior urethral valve"[Title/Abstract] OR "Prune belly syndrome"[Title/Abstract] OR "Medullary sponge kidney"[Title/Abstract] OR "Megacystis-megaureter syndrome"[Title/Abstract] OR "Bilateral multicystic dysplastic kidney"[Title/Abstract] OR "Unilateral multicystic dysplastic kidney"[Title/Abstract] OR "Oligomeganephronia"[Title/Abstract] OR "Bilateral Renal agenesis"[Title/Abstract] OR "Unilateral Renal agenesis"[Title/Abstract] OR "Renal hypoplasia unilateral"[Title/Abstract] OR "22q11.2 deletion syndrome"[Title/Abstract] OR "Di George syndrome"[Title/Abstract] OR "8q24.3 microdeletion syndrome"[Title/Abstract] OR "Acrorenal syndrome"[Title/Abstract] OR "AREDYLD syndrome"[Title/Abstract] OR "Arthrogryposis-renal dysfunction-cholestasis syndrome"[Title/Abstract] OR "Axial mesodermal dysplasia spectrum"[Title/Abstract] OR "BNAR syndrome"[Title/Abstract] OR "BOR syndrome"[Title/Abstract] OR "Cat-eye syndrome"[Title/Abstract] OR "Caudal regression syndrome"[Title/Abstract] OR "CHARGE syndrome"[Title/Abstract] OR "Cornelia de Lange syndrome"[Title/Abstract] OR "EEC syndrome"[Title/Abstract] OR "Ellis Van Creveld syndrome"[Title/Abstract] OR "Faciocardiorenal syndrome"[Title/Abstract] OR "Fraser syndrome"[Title/Abstract] OR "Hajdu-Cheney syndrome"[Title/Abstract] OR "Hypoparathyroidism-sensorineural deafness-renal disease syndrome"[Title/Abstract] OR "Jeune syndrome"[Title/Abstract] OR "Kabuki Syndrome"[Title/Abstract] OR "Kallmann syndrome"[Title/Abstract] OR "Meckel syndrome"[Title/Abstract] OR "Megacystis-microcolon-intestinal hypoperistalsis syndrome"[Title/Abstract] OR "Menke-Hennekam syndrome"[Title/Abstract] OR "Neurofaciodigitorenal syndrome"[Title/Abstract] OR "Noonan syndrome"[Title/Abstract] OR "Ochoa syndrome"[Title/Abstract] OR "Orofaciodigital syndrome type 1"[Title/Abstract] OR "Pallister-Hall syndrome"[Title/Abstract] OR "Renal coloboma syndrome"[Title/Abstract] OR "Renal nutcracker syndrome"[Title/Abstract] OR "Schinzel-Giedion syndrome"[Title/Abstract] OR "Simpson-Golabi-Behmel syndrome"[Title/Abstract]

OR "Smith-Lemli-Opitz syndrome"[Title/Abstract] OR "Thomas syndrome"[Title/Abstract] OR "Townes-Brocks syndrome"[Title/Abstract] OR "Trisomy 13"[Title/Abstract] OR "Trisomy 18"[Title/Abstract] OR "Turner syndrome"[Title/Abstract] OR "Monosomy X"[Title/Abstract] OR "Mosaic monosomy X"[Title/Abstract] OR "Ulbright-Hodes syndrome"[Title/Abstract] OR "VACTERL/VATER association"[Title/Abstract] OR "WAGR syndrome"[Title/Abstract] OR "Shiga toxin-associated hemolytic uremic syndrome"[Title/Abstract] OR "Streptococcus pneumoniae-associated hemolytic uremic syndrome"[Title/Abstract] OR "Pediatric systemic lupus erythematosus"[Title/Abstract] OR "Thrombotic thrombocytopenic purpura"[Title/Abstract] OR "Congenital thrombotic thrombocytopenic purpura"[Title/Abstract] OR "Immune-mediated thrombotic thrombocytopenic purpura"[Title/Abstract] OR "Acquired thrombotic thrombocytopenic purpura"[Title/Abstract] OR "Coenzyme q10 deficiency"[Title/Abstract] OR "Coffin Siris syndrome"[Title/Abstract] OR "Cockayne syndrome"[Title/Abstract])) OR ("Chromophobe renal cell carcinoma"[Title/Abstract] OR "Collecting duct carcinoma"[Title/Abstract] OR "MiT family translocation renal cell carcinoma"[Title/Abstract] OR "Papillary renal cell carcinoma"[Title/Abstract] OR "Renal medullary carcinoma"[Title/Abstract] OR "Tubulocystic renal cell carcinoma"[Title/Abstract] OR "Clear cell renal carcinoma"[Title/Abstract] OR "Clear cell papillary renal cell carcinoma"[Title/Abstract] OR "Multilocular cystic renal neoplasm of low malignant potential"[Title/Abstract] OR "Congenital hydronephrosis"[Title/Abstract] OR "Patent urachus"[Title/Abstract] OR "Urachal cyst"[Title/Abstract] OR "Urachal diverticulum"[Title/Abstract] OR "Urachal sinus"[Title/Abstract] OR "Duplication of urethra"[Title/Abstract] OR "Exstrophy-epispadias complex"[Title/Abstract] OR "Bladder exstrophy"[Title/Abstract] OR "Cloacal exstrophy"[Title/Abstract] OR "Isolated epispadias"[Title/Abstract] OR "Familial vesicoureteral reflux"[Title/Abstract] OR "Anterior urethral valve"[Title/Abstract] OR "Posterior urethral valve"[Title/Abstract] OR "Prune belly syndrome"[Title/Abstract] OR "Medullary sponge kidney"[Title/Abstract] OR "Megacystis-megaureter syndrome"[Title/Abstract] OR "Bilateral multicystic dysplastic kidney"[Title/Abstract] OR "Unilateral multicystic dysplastic kidney"[Title/Abstract] OR "Oligomeganephronia"[Title/Abstract] OR "Bilateral Renal agenesis"[Title/Abstract] OR "Unilateral Renal agenesis"[Title/Abstract] OR "Renal hypoplasia unilateral"[Title/Abstract] OR "22q11.2 deletion syndrome"[Title/Abstract] OR "Di George syndrome"[Title/Abstract] OR "8q24.3 microdeletion syndrome"[Title/Abstract] OR "Acrorenal syndrome"[Title/Abstract] OR "AREDYLD syndrome"[Title/Abstract] OR "Arthrogryposis-renal dysfunction-cholestasis syndrome"[Title/Abstract] OR "Axial mesodermal dysplasia spectrum"[Title/Abstract] OR "BNAR syndrome"[Title/Abstract] OR "BOR syndrome"[Title/Abstract] OR "Cat-eye syndrome"[Title/Abstract] OR "Caudal regression syndrome"[Title/Abstract] OR "CHARGE syndrome"[Title/Abstract] OR "Cornelia de Lange syndrome"[Title/Abstract] OR "EEC syndrome"[Title/Abstract] OR "Ellis Van Creveld syndrome"[Title/Abstract] OR "Faciocardiorrenal syndrome"[Title/Abstract] OR "Fraser syndrome"[Title/Abstract] OR "Hajdu-Cheney syndrome"[Title/Abstract] OR "Hypoparathyroidism-sensorineural deafness-renal disease syndrome"[Title/Abstract] OR "Jeune syndrome"[Title/Abstract] OR "Kabuki Syndrome"[Title/Abstract] OR "Kallmann syndrome"[Title/Abstract] OR "Meckel syndrome"[Title/Abstract] OR "Megacystis-microcolon-intestinal hypoperistalsis syndrome"[Title/Abstract] OR "Menke-Hennekam syndrome"[Title/Abstract] OR "Neurofaciodigitorenal syndrome"[Title/Abstract] OR "Noonan syndrome"[Title/Abstract] OR "Ochoa syndrome"[Title/Abstract] OR "Orofaciodigital syndrome type 1"[Title/Abstract] OR "Pallister-Hall syndrome"[Title/Abstract] OR "Renal coloboma syndrome"[Title/Abstract] OR "Renal nutcracker syndrome"[Title/Abstract] OR "Schinzel-Giedion syndrome"[Title/Abstract] OR "Simpson-Golabi-Behmel syndrome"[Title/Abstract] OR "Smith-Lemli-Opitz syndrome"[Title/Abstract] OR "Thomas syndrome"[Title/Abstract] OR "Townes-Brocks syndrome"[Title/Abstract] OR "Trisomy 13"[Title/Abstract] OR "Trisomy 18"[Title/Abstract] OR "Turner syndrome"[Title/Abstract] OR "Monosomy X"[Title/Abstract] OR "Mosaic monosomy X"[Title/Abstract] OR "Ulbright-Hodes syndrome"[Title/Abstract] OR "VACTERL/VATER association"[Title/Abstract] OR "WAGR syndrome"[Title/Abstract] OR "Shiga toxin-associated hemolytic uremic syndrome"[Title/Abstract] OR "Streptococcus pneumoniae-associated hemolytic uremic syndrome"[Title/Abstract] OR "Pediatric

|        |                                                                                                                                                                                                                                                                                                                                                                                                                                                                                                                                                                                                                                                                                                                                                                                                                                                                                                                                                                                                                                                                                                                                                                                                                                                                                                                                                                                                                                                                                                                                                                                                                                                                                                                                                                                                                                                                                                                                                                                                                                                                                                                                                                                                                                                                                                                                                                                                                                                                                                                              |          |
|--------|------------------------------------------------------------------------------------------------------------------------------------------------------------------------------------------------------------------------------------------------------------------------------------------------------------------------------------------------------------------------------------------------------------------------------------------------------------------------------------------------------------------------------------------------------------------------------------------------------------------------------------------------------------------------------------------------------------------------------------------------------------------------------------------------------------------------------------------------------------------------------------------------------------------------------------------------------------------------------------------------------------------------------------------------------------------------------------------------------------------------------------------------------------------------------------------------------------------------------------------------------------------------------------------------------------------------------------------------------------------------------------------------------------------------------------------------------------------------------------------------------------------------------------------------------------------------------------------------------------------------------------------------------------------------------------------------------------------------------------------------------------------------------------------------------------------------------------------------------------------------------------------------------------------------------------------------------------------------------------------------------------------------------------------------------------------------------------------------------------------------------------------------------------------------------------------------------------------------------------------------------------------------------------------------------------------------------------------------------------------------------------------------------------------------------------------------------------------------------------------------------------------------------|----------|
|        | systemic lupus erythematosus"[Title/Abstract] OR "Thrombotic thrombocytopenic purpura"[Title/Abstract] OR "Congenital thrombotic thrombocytopenic purpura"[Title/Abstract] OR "Immune-mediated thrombotic thrombocytopenic purpura"[Title/Abstract] OR "Acquired thrombotic thrombocytopenic purpura"[Title/Abstract] OR "Coenzyme q10 deficiency"[Title/Abstract] OR "Coffin Siris syndrome"[Title/Abstract] OR "Cockayne syndrome"[Title/Abstract])) OR ("Cardiofaciocutaneous syndrome"[Title/Abstract] OR "Burn-McKeown syndrome"[Title/Abstract] OR "Blackfan-Diamond anemia"[Title/Abstract] OR "Adrenal hypoplasia"[Title/Abstract] OR "Alkaptonuria"[Title/Abstract] OR "Acro-renal-ocular syndrome"[Title/Abstract] OR "5-oxoprolinase deficiency"[Title/Abstract] OR "Autosomal dominant periodic fever syndrome"[Title/Abstract] OR "Hereditary hemorrhagic telangiectasia"[Title/Abstract] OR "Hereditary orotic aciduria"[Title/Abstract] OR "Hermansky-Pudlak syndrome 1"[Title/Abstract] OR "Hydrolethalus syndrome"[Title/Abstract] OR "Hydroxykynureninuria"[Title/Abstract] OR "Hypercalcemia infantile 1"[Title/Abstract] OR "Hyperglycinuria"[Title/Abstract] OR "GM1-gangliosidosis type 1"[Title/Abstract] OR "GM1-gangliosidosis type 2"[Title/Abstract] OR "Hand-foot-uterus syndrome"[Title/Abstract] OR "Hennekam Lymphangiectasia-Lymphedema Syndrome"[Title/Abstract] OR "Hereditary angiopathy with nephropathy aneurysms and Muscle cramps"[Title/Abstract] OR "Glomerulopathy with fibronectin deposits 2"[Title/Abstract] OR "Glutaric aciduria 3"[Title/Abstract] OR "Galloway-Mowat syndrome"[Title/Abstract] OR "Gaucher disease"[Title/Abstract] OR "Genitopatellar syndrome"[Title/Abstract] OR "Fanconi anemia complementation group a"[Title/Abstract] OR "Fanconi anemia complementation group b"[Title/Abstract] OR "Fanconi anemia complementation group c"[Title/Abstract] OR "Fanconi anemia Complementation group d2"[Title/Abstract] OR "Fanconi anemia complementation group e"[Title/Abstract] OR "Fanconi anemia complementation group I"[Title/Abstract] OR "Fanconi anemia complementation group L"[Title/Abstract] OR "Cockayne syndrome"[Title/Abstract] OR "Feingold syndrome"[Title/Abstract] OR "Floating-Harbor syndrome"[Title/Abstract] OR "Focal dermal hypoplasia"[Title/Abstract] OR "Diaphanospondylodysostosis"[Title/Abstract] OR "Donnai-barrow syndrome"[Title/Abstract] OR "DOOR syndrome"[Title/Abstract] OR "Dyskeratosis congenita"[Title/Abstract])) |          |
| #<br>3 | #1 AND #2                                                                                                                                                                                                                                                                                                                                                                                                                                                                                                                                                                                                                                                                                                                                                                                                                                                                                                                                                                                                                                                                                                                                                                                                                                                                                                                                                                                                                                                                                                                                                                                                                                                                                                                                                                                                                                                                                                                                                                                                                                                                                                                                                                                                                                                                                                                                                                                                                                                                                                                    | 12<br>39 |
| #<br>4 | #3 and Limit by last 10 years (from 2013 – 2023)                                                                                                                                                                                                                                                                                                                                                                                                                                                                                                                                                                                                                                                                                                                                                                                                                                                                                                                                                                                                                                                                                                                                                                                                                                                                                                                                                                                                                                                                                                                                                                                                                                                                                                                                                                                                                                                                                                                                                                                                                                                                                                                                                                                                                                                                                                                                                                                                                                                                             | 82<br>4  |

Figure S1 - PRISMA flow chart of study inclusion

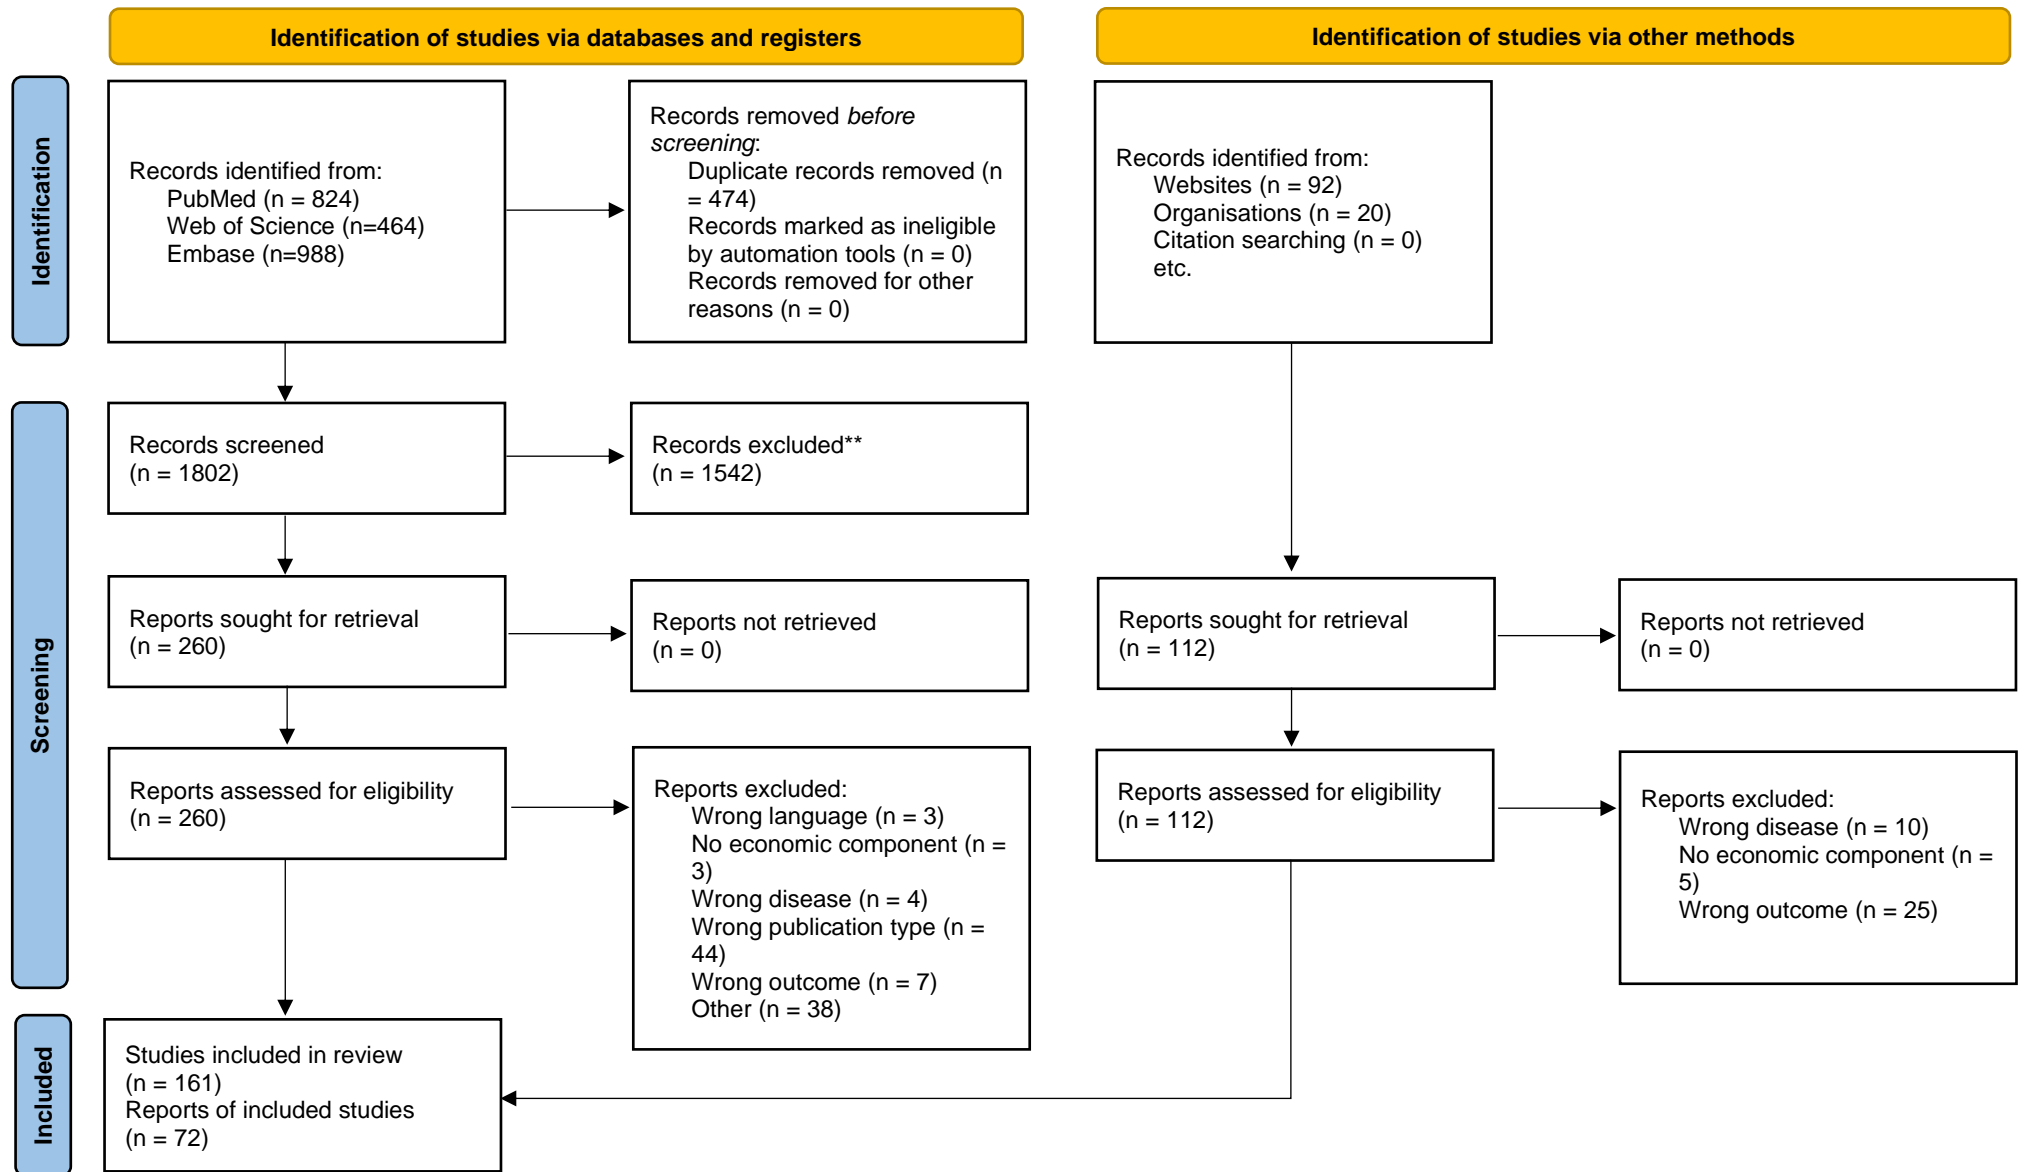



**Table S2 – Overview of cost-of-illness studies**

| Author | Year | Country     | RKD                                                 | Perspective       | Study period | Sample size                                            | Cost elements included                                                                                                        | Result                                                                                                                                                         | Key drivers of costs                                                                                                                                                                                                                                   | Funding                                         |
|--------|------|-------------|-----------------------------------------------------|-------------------|--------------|--------------------------------------------------------|-------------------------------------------------------------------------------------------------------------------------------|----------------------------------------------------------------------------------------------------------------------------------------------------------------|--------------------------------------------------------------------------------------------------------------------------------------------------------------------------------------------------------------------------------------------------------|-------------------------------------------------|
| Jonsen | 2016 | Sweden      | Systemic Lupus Erythematosus                        | Societal          | 8 years      | 1,029 SLE patients                                     | Direct medical costs (inpatient, specialist outpatient and drugs) and indirect costs (sickness leave and disability pensions) | The total annual cost per patient was 208,555 SEK (\$33,369) of which the direct costs were 63,672kr (\$10,188) and indirect costs were 144,883 SEK (\$23,181) | Costs (direct and indirect) increased for patients with short disease duration, higher disease activity and those with damage in the neuropsychiatric and musculoskeletal domains. Organ damage in the renal and ocular systems increased direct costs | Glaxo Smith Kline                               |
| Kim    | 2020 | South Korea | Systemic Lupus Erythematosus and systemic sclerosis | Health care payer | 5 years      | 19,441 SLE patients, 3,606 systemic sclerosis patients | Direct medical costs                                                                                                          | Annual medical costs per patient were: \$1425 in 2016 for SLE patients and \$1,440 for SSc patients.                                                           | For both SLE and SSc patients, medications accounted for the majority of costs, however, lab tests grow at the fastest rate between 2012-2016, accounting for a larger portion of total costs.                                                         | Rheumatology Research Foundation of South Korea |

|             |      |         |                              |              |                |      |                                                                       |                                                                                                                                                                                                                                                                                                                               |                                                                               |                                          |
|-------------|------|---------|------------------------------|--------------|----------------|------|-----------------------------------------------------------------------|-------------------------------------------------------------------------------------------------------------------------------------------------------------------------------------------------------------------------------------------------------------------------------------------------------------------------------|-------------------------------------------------------------------------------|------------------------------------------|
| Connolly    | 2021 | Belgium | Acute hepatic porphyria      | Societal     | Lifetime model | NA   | Medical costs, disability payment, tax intake                         | Lifetime health costs were estimated to be over 3 million Euros. Individuals with Acute Hepatic porphyria had reduced lifetime earnings (347,802 Euros less), resulting in tax intake €183,187 lower than general population. There was an associated increase in disability payments of €179,184 per person over a lifetime. | Frequent hospitalisations from porphyria attacks were the key drivers of cost | Alnylam Pharmaceutical, The Netherlands. |
| Anandarajah | 2017 | USA     | Systemic lupus erythematosus | Patients     | 2 years        | 104  | Direct medical costs and indirect costs (lost productivity)           | The mean annual cost per patient for hospitalization was US\$51,808.                                                                                                                                                                                                                                                          | Hospitalisation, length of stay and readmission                               | No funding source reported               |
| Bell        | 2022 | USA     | Systemic lupus erythematosus | Health payer | 10 years       | 8952 | Direct medical costs including inpatient, outpatient, pharmaceuticals | Inpatient, emergency department and outpatient claims increased from pre- to post-index date and mean (SD) all-                                                                                                                                                                                                               | Direct medical costs for treating organ damage in patients with SLE           | Funded by GlaxoSmithKline                |

|      |      |     |                                                               |              |          |                                                                         |                                                                       |                                                                                                                                       |                                                                                                                            |                           |
|------|------|-----|---------------------------------------------------------------|--------------|----------|-------------------------------------------------------------------------|-----------------------------------------------------------------------|---------------------------------------------------------------------------------------------------------------------------------------|----------------------------------------------------------------------------------------------------------------------------|---------------------------|
|      |      |     |                                                               |              |          |                                                                         |                                                                       | cause costs were 71% higher post-versus pre-index date                                                                                |                                                                                                                            |                           |
| Bell | 2023 | USA | Systemic lupus erythematosus with and without lupus nephritis | Health payer | 2 years  | 11,663 (LN, n = 2,916; non-LN, n = 8,747)                               | Direct medical costs including inpatient, outpatient, pharmaceuticals | The mean total healthcare costs associated with SLE flares of any severity were greater for patients with LN                          | Patients with SLE + LN experience more frequent and severe disease flares resulting in higher direct medical costs         | Funded by GlaxoSmithKline |
| Bell | 2023 | USA | Systemic lupus erythematosus with and without lupus nephritis | Health payer | 1 year   | 2,310 patients with LN and 2310 matched patients who had SLE without LN | Direct medical costs including inpatient, outpatient, pharmaceuticals | Total all-cause costs per patient in the LN cohort were also significantly higher compared with the SLE without LN cohort             | All-cause healthcare resource utilization was higher for SLE patients with LN resulting in significantly higher costs      | Funded by GlaxoSmithKline |
| Bell | 2021 | USA | Eosinophilic granulomatosis with polyangiitis (EGPA)          | Health payer | 10 years | 8,904 patients matched (EGPA (n = 2,226), asthma (n = 6,678))           | Direct medical costs including inpatient, outpatient, pharmaceuticals | Patients with EGPA have more comorbidities, greater health care costs and HCRU, and use SCS more frequently than patients with asthma | Patients with EGPA experience greater costs due to higher health care resource utilisation and systemic corticosteroid use | Funded by GlaxoSmithKline |

|          |      |     |                                         |              |         |                                                                                   |                                                                       |                                                                                                                                                                                                                                     |                                                                                                                                                                                                                                    |                                          |
|----------|------|-----|-----------------------------------------|--------------|---------|-----------------------------------------------------------------------------------|-----------------------------------------------------------------------|-------------------------------------------------------------------------------------------------------------------------------------------------------------------------------------------------------------------------------------|------------------------------------------------------------------------------------------------------------------------------------------------------------------------------------------------------------------------------------|------------------------------------------|
| Betts    | 2020 | USA | Epilepsy and Tuberous sclerosis complex | Health payer | 1 year  | 2,028 patients with epilepsy + TSC matched to 10,140 patients with epilepsy alone | Direct medical costs including inpatient, outpatient, pharmaceuticals | Epilepsy-related costs were significantly higher for patients with TSC; the cost difference per patient was \$14,639 for prescription costs ( $p < 0.001$ ), and the charge difference per patient was \$16,838 for medical charges | Higher utilisation of healthcare services, possibly including long-term care facilities, as well as surveillance with frequent diagnostic investigations                                                                           | Supported by Greenwich Biosciences, Inc. |
| Bhandari | 2022 | USA | Renal cell carcinoma                    | Health payer | 8 years | 11,228 RCC patients matched with 56,140 controls                                  | Direct medical costs including inpatient, outpatient, pharmaceuticals | Per-patient cumulative average total costs were 3.6 and 1.7 times higher for RCC vs controls, at 1 and 5 years respectively.                                                                                                        | Prescription drug costs accounted for 8.4% and 18.1% of the 1-year and 5-year incremental total costs, respectively. RCC patients had greater cumulative number of hospitalizations, emergency department visits and prescriptions | No funding source reported               |

|          |      |       |                              |              |         |     |                                                                       |                                                                                                                                                                        |                                                                                                                                                                                                                                                                                 |                                    |
|----------|------|-------|------------------------------|--------------|---------|-----|-----------------------------------------------------------------------|------------------------------------------------------------------------------------------------------------------------------------------------------------------------|---------------------------------------------------------------------------------------------------------------------------------------------------------------------------------------------------------------------------------------------------------------------------------|------------------------------------|
| Blaylock | 2020 | USA   | Acute intermittent porphyria | Health payer | 2 years | 139 | Direct medical costs including inpatient, outpatient, pharmaceuticals | Real-world annualized total expenditures for all-cause (any diagnosis) and AIP-related care are much less than previous estimates of AIP treatment costs.              | NA                                                                                                                                                                                                                                                                              | Funded by Recordati Rare Diseases. |
| Buja     | 2022 | Italy | Renal cell carcinoma         | Health payer | 2 years | 148 | Direct medical costs including inpatient, outpatient, pharmaceuticals | Two years after diagnosis, the average total costs amounted to €21,429 per patient. Expenditure for stage IV patients was 2.44 times higher than for stage I patients. | Hospitalization appeared to be the most expensive item for both early and advanced disease. In the second year, however, outpatient procedures were the main cost driver in the earlier stages, whereas anticancer drugs accounted for the highest costs in the advanced stages | No funding source reported         |

|      |      |             |                              |              |          |        |                                                                                              |                                                                                                                                                                                                                            |                                                                                                                                                                            |                                                                                              |
|------|------|-------------|------------------------------|--------------|----------|--------|----------------------------------------------------------------------------------------------|----------------------------------------------------------------------------------------------------------------------------------------------------------------------------------------------------------------------------|----------------------------------------------------------------------------------------------------------------------------------------------------------------------------|----------------------------------------------------------------------------------------------|
| Chiu | 2022 | Taiwan      | Systemic lupus erythematosus | Health payer | 4 years  | 22,258 | Direct medical costs including inpatient, outpatient, pharmaceuticals                        | The estimated annual expenditures incurred by SLE patients without organ damage accrual were US\$3,167, while the estimated annual expenditure incurred by whole cohort of SLE patients in the first 6 months was US\$5094 | Medical costs associated with organ damage, particularly the ocular and musculoskeletal systems (incurring annual medical costs of US\$4615 and US\$19,363, respectively). | Funded by GlaxoSmithKline                                                                    |
| Cho  | 2014 | South Korea | Systemic lupus erythematosus | Societal     | 2 months | 201    | Direct medical costs; direct nonmedical costs; indirect costs representing productivity loss | The average total cost of illness was estimated to be KRW 9.82 million (US \$ 8,993) per year, of which 41.6% was accounted for by direct costs and 58.4% by indirect costs.                                               | The occurrence of a renal disorder and depression were both associated with increased annual total and direct costs                                                        | Supported by the MKE/KEIT R&D Program the Ministry of Health and Welfare, Republic of Korea. |

|                |      |           |                                 |              |          |     |                                                                       |                                                                                                                                                                                 |                                                                                                                                                                                                                                                                                    |                            |
|----------------|------|-----------|---------------------------------|--------------|----------|-----|-----------------------------------------------------------------------|---------------------------------------------------------------------------------------------------------------------------------------------------------------------------------|------------------------------------------------------------------------------------------------------------------------------------------------------------------------------------------------------------------------------------------------------------------------------------|----------------------------|
| Cholley et al. | 2018 | France    | Metastatic renal cell carcinoma | Health payer | NA       | 224 | Direct medical costs including travel time                            | The mean cost of illness was estimated at 71,185 (plus/minus 52,683). Outpatient/inpatient treatment and hospitalization represented 76.0% and 19.7% of this cost, respectively | Cost of illness was significantly associated with time of disease control for metastatic first-line treatment of greater than 6 months, more than 2 lines of treatment, nephrectomy at metastatic stage, lack of metastases at presentation, being younger than 65 at presentation | No funding source reported |
| Chu            | 2020 | Hong Kong | Tuberous sclerosis complex      | Health payer | 10 years | 304 | Direct medical costs including inpatient and outpatient               | Total average cost per patient per year was US\$7,701                                                                                                                           | Out patient visits accounted for 75.6% of total average cost per patient per year, followed by ICU (18.4%)                                                                                                                                                                         | No funding received        |
| Clarke         | 2015 | Canada    | Systemic lupus erythematosus    | Health payer | 2 years  | 109 | Direct medical costs including inpatient, outpatient, pharmaceuticals | The average annual direct medical cost was \$10,608 Canadian (2010 dollars) and was higher for patients with severe disease, \$15,048 versus \$5,917 for mild                   | Cost was driven by inpatient stays and medication.                                                                                                                                                                                                                                 | Funded by GlaxoSmithKline  |

|          |      |     |                              |              |          |        |                                                                       |                                                                                                                                                                                                                                                                                   |                                                                                                                                                             |                                   |
|----------|------|-----|------------------------------|--------------|----------|--------|-----------------------------------------------------------------------|-----------------------------------------------------------------------------------------------------------------------------------------------------------------------------------------------------------------------------------------------------------------------------------|-------------------------------------------------------------------------------------------------------------------------------------------------------------|-----------------------------------|
| Clarke   | 2020 | USA | Systemic lupus erythematosus | Health payer | 1 year   | 9033   | Direct medical costs including inpatient, outpatient, pharmaceuticals | Adjusted mean total healthcare costs, excluding pharmacy, for moderate/severe SLE patients were higher than for mild SLE patients in the commercially-insured (\$39,021 versus \$23,519; $p < 0.0001$ ) and Medicaid-insured populations (\$56,050 versus \$44,932; $p = 0.06$ ). | For Medicaid-insured patients, inpatient admission costs were the largest single driver of costs. For commercially-insured patients, outpatient costs were. | Funded by AstraZeneca             |
| Dall'Era | 2023 | USA | Lupus nephritis              | Health payer | 12 years | 21,251 | Direct medical costs including inpatient, outpatient, pharmaceuticals | Mean medical costs were \$4,777 per month in active disease and \$18,084 per month in ESRD (end-stage renal disease) vs \$2,523 per month in low disease activity                                                                                                                 | The main medical cost drivers were inpatient visits (\$13,756) and other outpatient visits (\$3,013).                                                       | Funded by Aurinia Pharmaceuticals |



|         |      |       |                                 |              |         |                  |                                                                       |                                                                                                                                                                                                                        |                                                                                                                                                                          |                                     |
|---------|------|-------|---------------------------------|--------------|---------|------------------|-----------------------------------------------------------------------|------------------------------------------------------------------------------------------------------------------------------------------------------------------------------------------------------------------------|--------------------------------------------------------------------------------------------------------------------------------------------------------------------------|-------------------------------------|
| Doria   | 2015 | Italy | Systemic lupus erythematosus    | Health payer | 2 years | 96               | Direct medical costs including inpatient, outpatient, pharmaceuticals | The annual medical cost was 1.6 times higher in severe than in non-severe patients (€2,101 vs. €1,320; $p=0.031$ ). The cost of medications was also 2.5 times higher in severe patients (€1101 vs. €445, $p=0.007$ ). | Medications, especially immunosuppressant drugs, were the major cost drivers since they represented the large majority of the total cost of SLE.                         | Funded by GlaxoSmithKline           |
| D'Souza | 2022 | USA   | Amyloid light chain amyloidosis | Health payer | 3 years | 1,341 admissions | Direct medical costs                                                  | The mean (SD) total hospitalization cost was \$27,099 (\$34,849) for hospitalized patients with AL amyloidosis, compared to an the average cost of \$14,661 (\$129) for all hospital stays.                            | Diagnostic hospitalizations had higher cost (\$40,052 vs \$24,360; $p < 0.001$ ) and higher total charges (\$161,526 vs \$104,129; $p < 0.001$ ) than nondiagnostic ones | Funded by Prothena Biosciences Ltd. |

|          |      |                                                     |                                              |          |        |     |                                                                                                                           |                                                                                                                                                                                                                                                                                                                                                                                     |                                                                                                                                                                                                     |                                     |
|----------|------|-----------------------------------------------------|----------------------------------------------|----------|--------|-----|---------------------------------------------------------------------------------------------------------------------------|-------------------------------------------------------------------------------------------------------------------------------------------------------------------------------------------------------------------------------------------------------------------------------------------------------------------------------------------------------------------------------------|-----------------------------------------------------------------------------------------------------------------------------------------------------------------------------------------------------|-------------------------------------|
| Eriksson | 2017 | Multi-country (Denmark, Finland, Norway and Sweden) | Autosomal dominant polycystic kidney disease | Patients | 1 year | 243 | Direct medical costs and indirect costs including informal care and productivity loss (using the human capital approach). | Average total annual costs were highest for dialysis patients, followed by transplant recipients, patients in CKD stages 4–5 and CKD stages 1–3 ( $P < 0.0001$ , for all countries). Compared to CKD stages 1–3, annual costs were almost twice as high in CKD stages 4–5, two to three times higher in transplant recipients, and seven to nine times higher in dialysis patients. | Direct costs were almost twice as high in patients with CKD stages 4–5 compared to stages 1–3, but around six times higher among transplant recipients and 21 times higher among dialysis patients. | Funded by Otsuka Pharma Scandinavia |
|----------|------|-----------------------------------------------------|----------------------------------------------|----------|--------|-----|---------------------------------------------------------------------------------------------------------------------------|-------------------------------------------------------------------------------------------------------------------------------------------------------------------------------------------------------------------------------------------------------------------------------------------------------------------------------------------------------------------------------------|-----------------------------------------------------------------------------------------------------------------------------------------------------------------------------------------------------|-------------------------------------|

|              |      |        |                                                                                          |              |          |                                                                                                     |                                                                       |                                                                                                                                                                                                                                                                                                                   |                                                                                                                                          |                                   |
|--------------|------|--------|------------------------------------------------------------------------------------------|--------------|----------|-----------------------------------------------------------------------------------------------------|-----------------------------------------------------------------------|-------------------------------------------------------------------------------------------------------------------------------------------------------------------------------------------------------------------------------------------------------------------------------------------------------------------|------------------------------------------------------------------------------------------------------------------------------------------|-----------------------------------|
| Fagnani      | 2022 | France | Tuberous sclerosis complex with epilepsy and tuberous sclerosis complex without epilepsy | Health payer | 13 years | 3,139                                                                                               | Direct medical costs including inpatient, outpatient, pharmaceuticals | Patients with epilepsy had higher annual healthcare costs (both inpatient and outpatient costs) compared with patients without epilepsy. A greater proportion of patients with epilepsy than without epilepsy were hospitalized (46% vs 32%) or visited a hospital specialist (65% vs 51%) at least once in 2018. | The most notable cost difference was seen in medication costs, which were 2.8 times higher in patients with epilepsy than those without. | Funded Jazz Pharmaceuticals, Inc. |
| Fatoye et al | 2021 | Canada | Systemic lupus erythematosus                                                             | Health payer | 1 year   | 10,932 SLE cases (M = 2,546; F = 8,386). 41,851,36 non-SLE controls (M = 21,157,76; F = 20,693,60). | Direct medical costs                                                  | The mean annual costs of SLE, and non-SLE per case were \$7,740.19 (Male = \$7,986.59; Female = \$7,665.38), and \$2,479.53 (Male = \$2,265.57; Female = \$2,698.30), (p < 0.001) respectively.                                                                                                                   | The key cost drivers for the direct health care costs of SLE were inpatient hospital services (49%).                                     | No funding received               |

|                    |      |     |                                              |              |        |                                                                     |                      |                                                                                                                                                                                                                                                                    |                                                                                                                                                                                         |                                                                       |
|--------------------|------|-----|----------------------------------------------|--------------|--------|---------------------------------------------------------------------|----------------------|--------------------------------------------------------------------------------------------------------------------------------------------------------------------------------------------------------------------------------------------------------------------|-----------------------------------------------------------------------------------------------------------------------------------------------------------------------------------------|-----------------------------------------------------------------------|
| Furst et al        | 2013 | USA | Systemic lupus erythematosus                 | Health payer | 1 year | 907 (88% F) patients with SLE+LN. 1,062 (93% F) patients with NPSLE | Direct medical costs | Average annual healthcare costs for subjects with LN were \$33,472 (95% CI = \$29,797–\$37,146). For NPSLE subjects, average annual healthcare costs were \$30,341 (95% CI = \$27,209–\$33,474). Both are significantly higher (by 6–7-fold) compared to controls. | Patients with NPSLE had higher mean numbers of ambulatory visits, specialist visits, emergency department visits and inpatient hospital stays, compared to controls (all $p < 0.001$ ). | Sponsored by MedImmune, LLC.                                          |
| Gagnon-Sanschagrin | 2021 | USA | Autosomal dominant polycystic kidney disease | Health payer | 1 year | 9,227 cases                                                         | Direct medical costs | A mean cost difference of \$22,879 per patient per year between ADPKD cases and controls                                                                                                                                                                           | The largest incremental costs were observed in the end-stage renal disease requiring renal replacement therapy, driven by the cost of dialysis                                          | Funded by Otsuka Pharmaceutical Development & Commercialization, Inc. |
| Geynisman et al    | 2014 | USA | Metastatic renal cell carcinoma              | Health payer | 1 year | 767 patients receiving modern therapy < 65 years                    | Direct medical costs | First-year drug cost per patient with ancillary services = \$59,664 for first-line oral treatment. \$86,518 for                                                                                                                                                    | Drug costs increased significantly between 2004-2010, switching treatments                                                                                                              | No funding source reported                                            |

|              |      |     |                                                           |              |          |                                                  |                                                                       |                                                                                                                                                                                         |                                                                                                  |                            |
|--------------|------|-----|-----------------------------------------------------------|--------------|----------|--------------------------------------------------|-----------------------------------------------------------------------|-----------------------------------------------------------------------------------------------------------------------------------------------------------------------------------------|--------------------------------------------------------------------------------------------------|----------------------------|
|              |      |     |                                                           |              |          |                                                  |                                                                       | first-line IV treatment                                                                                                                                                                 |                                                                                                  |                            |
| Hagiwara     | 2013 | USA | Renal cell carcinoma                                      | Health payer | 1 year   | 881 patients aged > 65 years with adverse events | Direct medical costs excluding the costs of targeted therapy          | Mean (SD) total cost of care over 30 days was substantially higher among patients with AEs (\$13,944 [\$14,529]) compared with those without mention of these events (\$1878 [\$5264]). | Treatment costs for adverse events                                                               | Funded by GlaxoSmithKline  |
| Jiang et al. | 2021 | USA | Systemic lupus erythematosus                              | Health payer | 2 years  | 2227                                             | Direct medical costs including inpatient, outpatient, pharmaceuticals | Mean per-patient costs post-diagnosis for mild SLE: US\$13,415; moderate SLE: US\$29,512; severe SLE: US\$68,260.                                                                       | Leading mean cost drivers were outpatient visits (US\$13 566) and hospitalisations (US\$10 252). | Funded by AstraZeneca      |
| Jonasch      | 2023 | USA | von Hippel-Lindau disease-associated renal cell carcinoma | Health payer | 13 years | 160 with disease, 800 controls                   | Direct medical costs                                                  | Patients with the disease have \$36,450 higher annual healthcare costs than patients without.                                                                                           | Annual cost difference was mainly driven by higher medical costs (\$47,372 vs. \$9,671 per year) | Funded by Merck & Co., Inc |

|        |      |         |                                                                                      |              |         |                                                                                            |                                                                       |                                                                                                                                                                                                            |                                                                                                                                                 |                                                                         |
|--------|------|---------|--------------------------------------------------------------------------------------|--------------|---------|--------------------------------------------------------------------------------------------|-----------------------------------------------------------------------|------------------------------------------------------------------------------------------------------------------------------------------------------------------------------------------------------------|-------------------------------------------------------------------------------------------------------------------------------------------------|-------------------------------------------------------------------------|
| Jönsen | 2015 | Sweden  | Systemic lupus erythematosus                                                         | Societal     | 8 years | 127 SLE patients and 508 population controls                                               | Direct medical costs including inpatient, outpatient, pharmaceuticals | The mean annual total cost for SLE patients was SEK 180,520 (\$30,093), compared to controls of SEK 59,985 (\$10,000)                                                                                      | 72% of total costs were due to indirect costs, 3% to SLE-specific pharmaceuticals, and the remaining 25% were in- and outpatient related costs. | Supported by a research grant from GlaxoSmithKline                      |
| Kan    | 2013 | USA     | Systemic lupus erythematosus                                                         | Health payer | 7 years | 14,262 SLE patients matched to controls                                                    | Direct medical costs including inpatient, outpatient, pharmaceuticals | The incremental annual cost associated with SLE was \$10,984. Cost per flare was \$11,716 for severe flares, \$562 for moderate flares, and \$129 for mild flares                                          | Inpatient and outpatient costs were the dominant cost drivers, consisting of 47% and 38% of total cost for SLE patients.                        | Funded by GlaxoSmithKline and Human Genome Sciences                     |
| Karl   | 2017 | Germany | Alpha-1 Antitrypsin Deficiency associated with chronic obstructive pulmonary disease | Patients     | 2 years | 131 AATD patients (106 with, 25 without augmentation therapy (AT)) and 2,049 COPD patients | Direct medical costs and indirect costs                               | Adjusted mean direct annual costs were €6,099 in AATD patients without AT, €7,117 in AATD patients with AT, and €7,460 in COPD patients without AATD. There were no significant differences between groups | Not reported                                                                                                                                    | Study was supported by the Competence Network Asthma and COPD (ASCONET) |

|           |      |        |                                                                  |              |         |                                                       |                                                                        |                                                                                                                                                                                |                                                                                                                                                                                  |                            |
|-----------|------|--------|------------------------------------------------------------------|--------------|---------|-------------------------------------------------------|------------------------------------------------------------------------|--------------------------------------------------------------------------------------------------------------------------------------------------------------------------------|----------------------------------------------------------------------------------------------------------------------------------------------------------------------------------|----------------------------|
|           |      |        |                                                                  |              |         |                                                       |                                                                        | regarding indirect costs.                                                                                                                                                      |                                                                                                                                                                                  |                            |
| Kawalec   | 2015 | Poland | Systemic sclerosis, Systemic lupus erythematosus and sarcoidosis | Societal     | 1 year  | 4,800 (SLE: 1600; SS: 500; sarcoidosis: 2700)         | Indirect costs due to absenteeism, based on the human capital approach | For SLE, systemic sclerosis and sarcoidosis in 2012, total indirect costs were as high as 7,260,595, 2,268,571 and 4,027,575 EUR, respectively.                                | For SLE and systemic sclerosis, long-term disability is the main cost driver (74.2% and 76.7% of costs, respectively). For sarcoidosis, sick leave accounted for 53.9% of costs. | No funding source reported |
| Khamashta | 2013 | UK     | Systemic lupus erythematosus                                     | Health payer | 2 years | 86 patients, 38 with severe SLE and 48 non-severe SLE | Direct medical costs                                                   | The mean annual direct medical cost of SLE was estimated at €3,231 per patient and was 2.2 times higher in patients with severe SLE compared with patients with non-severe SLE | Renal disease involvement and severe flares were associated with higher annual direct costs                                                                                      | Funded by GlaxoSmithKline  |

|           |      |         |                                                                     |              |         |                                           |                                                                                                                                                                              |                                                                                                                                                                               |                                                                                                                               |                                                                     |
|-----------|------|---------|---------------------------------------------------------------------|--------------|---------|-------------------------------------------|------------------------------------------------------------------------------------------------------------------------------------------------------------------------------|-------------------------------------------------------------------------------------------------------------------------------------------------------------------------------|-------------------------------------------------------------------------------------------------------------------------------|---------------------------------------------------------------------|
| Kingswood | 2016 | UK      | Tuberous sclerosis complex                                          | Health payer | 3 years | 286 patients with TSC matched to controls | Direct medical costs including inpatient, outpatient, pharmaceuticals                                                                                                        | TSC patients had costs totaling £12,681 per patient over the 3-year period, a figure 2.7-fold greater than the total costs in the comparator cohort (£4,777).                 | Manifestation in other organs (particularly, kidney, urinary tract and nervous system) significantly increased patient costs. | Funded by Novartis                                                  |
| Knarborg  | 2022 | Denmark | Systemic sclerosis with and without interstitial lung disease (ILD) | Societal     | 9 years | 1,869 cases and 7463 matched controls     | Direct medical costs and indirect costs (estimated as the difference in earnings between cases and controls based on earned income and various social security compensation) | Total excess cost (direct healthcare, elderly care and indirect costs) in the systemic sclerosis-ILD cohort was €29,725, and €17,905 in the non-ILD systemic sclerosis cohort | Healthcare costs and forgone earnings were the key drivers of excess costs in both cohorts.                                   | Funded by Boehringer Ingelheim                                      |
| Liu       | 2017 | China   | Renal cell carcinoma                                                | Health payer | 5 years | NA                                        | Direct medical costs including inpatient, outpatient, pharmaceuticals                                                                                                        | Drug costs accounted for the largest proportion of medical expenditures each year, with the highest of 37.8% in 2012,                                                         | Drug costs shared the largest proportion (40.95%) of structural variation, followed by the costs of                           | Supported by Beijing Municipal Commission of Science and Technology |



|                     |      |       |                                                                        |              |         |                     |                                                                                                                                                   |                                                                                                                                                                                       |                                                                                                |                                 |
|---------------------|------|-------|------------------------------------------------------------------------|--------------|---------|---------------------|---------------------------------------------------------------------------------------------------------------------------------------------------|---------------------------------------------------------------------------------------------------------------------------------------------------------------------------------------|------------------------------------------------------------------------------------------------|---------------------------------|
|                     |      |       |                                                                        |              |         |                     |                                                                                                                                                   | slowly declining in following years.                                                                                                                                                  | surgeries (18.35%).                                                                            |                                 |
| Lokhandwala         | 2021 | USA   | Systemic lupus erythematosus patients initiating intravenous belimumab | Health payer | 2 years | 908 (female, 93.4%) | Direct medical costs including inpatient, outpatient, pharmaceuticals                                                                             | Despite reduced disease activity, mean all-cause hospital-based costs increased 1.4 from the pre-index to the post-index period (\$7,735 vs \$11,030; p = 0.396)                      | Drug acquisition cost and administration schedule for IV belimumab                             | Funded by GlaxoSmithKline       |
| Lopez-Bastida et al | 2014 | Spain | Systemic sclerosis                                                     | Societal     | 1 year  | 147                 | Direct medical costs, direct non-health care costs (e.g., informal care) and loss of labour productivity (using the human capital based approach) | The average annual cost per SS patient was €21,042. Direct health care costs amounted to €8,235, direct non-health care costs were €5,503, and loss of labor productivity was €7,303. | The largest expenditures for SS patients were early retirement, informal care, and medication. | Supported by the European Union |

|                  |      |        |                              |              |         |                                                          |                                                                       |                                                                                                                                                                                                                                                             |                                                                                                                             |                                                                                            |
|------------------|------|--------|------------------------------|--------------|---------|----------------------------------------------------------|-----------------------------------------------------------------------|-------------------------------------------------------------------------------------------------------------------------------------------------------------------------------------------------------------------------------------------------------------|-----------------------------------------------------------------------------------------------------------------------------|--------------------------------------------------------------------------------------------|
| Maroun           | 2016 | France | Renal cell carcinoma         | Health payer | 5 years | 15,752 (female, 32%)                                     | Direct medical costs including inpatient, outpatient, pharmaceuticals | The mean annual costs per patient for outpatient hospitalisations and inpatient hospitalisations were respectively 7,413€ (SD: 15,679) and 12,259€ (SD: 11,348).                                                                                            | Inpatient hospitalisations and expensive drugs                                                                              | No funding source reported                                                                 |
| McCormick et al. | 2018 | Canada | Systemic lupus erythematosus | Health payer | 6 years | 3,632 SLE cases (86% female) and matched 18,060 controls | Direct medical costs including inpatient, outpatient, pharmaceuticals | Per-person all-cause medical costs for SLE the year after diagnosis averaged C\$12,019 (2013) compared to C\$2,412 for non-SLE patients. Leading up to diagnosis, per-person healthcare costs for SLE patients increased year-over-year by 35%, on average. | The year after diagnosis, 58% of costs were due to hospitalisations, 24% outpatient, and 18% from prescription medications. | Supported by the Canadian Arthritis Network and the Canadian Institutes of Health Research |
| Miyazaki         | 2020 | Japan  | Systemic lupus erythematosus | Health payer | 6 years | 4733 (78.5% female)                                      | Direct medical costs including                                        | Total annual per-patient cost = ¥1,017,012                                                                                                                                                                                                                  | Severity of disease                                                                                                         | Funded by Janssen Pharmaceutical K.K                                                       |

|           |      |             |                              |              |         |                                                      |                                                                       |                                                                                                                                                                                                                                                                         |                                                                                                                                                                     |                            |
|-----------|------|-------------|------------------------------|--------------|---------|------------------------------------------------------|-----------------------------------------------------------------------|-------------------------------------------------------------------------------------------------------------------------------------------------------------------------------------------------------------------------------------------------------------------------|---------------------------------------------------------------------------------------------------------------------------------------------------------------------|----------------------------|
|           |      |             |                              |              |         |                                                      | inpatient, outpatient, pharmaceuticals                                |                                                                                                                                                                                                                                                                         |                                                                                                                                                                     |                            |
| Morrisroe | 2017 | Australia   | Systemic sclerosis           | Patients     | 4 years | 531                                                  | Direct medical costs including inpatient, outpatient, pharmaceuticals | Total healthcare utilization cost to the Australian government extrapolated to all Australian SSc patients from 2011 to 2015 was AUD \$297,663,404, an average annual cost of AUD \$59,532,680 (US \$43,816,040) and annual cost per patient of AUD\$11,607 (US\$8,542) | hospital related cost accounted for the majority of the total direct healthcare cost (44.4%), followed by medication cost (31.2%) and ambulatory care cost (21.1%). | No funding source reported |
| Neeleman  | 2018 | Netherlands | Acute intermittent porphyria | Health payer | NA      | 88 (68.2% female) including 53 asymptomatic controls | Direct medical costs including inpatient, outpatient, pharmaceuticals | Total medical healthcare cost for recurrent cases group was €5.8 million versus €0.3 million for the symptomatic cases group                                                                                                                                            | Not reported                                                                                                                                                        | No funding source reported |

|        |      |             |                              |              |          |                                                          |                                                                           |                                                                                                                                                                                                                       |                                                                                                                         |                            |
|--------|------|-------------|------------------------------|--------------|----------|----------------------------------------------------------|---------------------------------------------------------------------------|-----------------------------------------------------------------------------------------------------------------------------------------------------------------------------------------------------------------------|-------------------------------------------------------------------------------------------------------------------------|----------------------------|
| Padala | 2022 | New Zealand | Systemic sclerosis           | Patients     | 6 months | 86 (90% female)                                          | Direct medical costs and productivity loss                                | The average total direct costs for the 6 months for health as reported by patients was NZ\$ 444.50. The calculated percentage productivity loss was 46.5%, amounting to an average loss of NZ\$ 22,786 annual income. | Mobility aids and protective gear accounted for 29% of costs, followed by self-funded health practitioner visits (23%). | No funding source reported |
| Park   | 2015 | South Korea | Systemic lupus erythematosus | Health payer | 1 year   | 749 (92.7% female)                                       | Direct medical costs including inpatient admissions and outpatient visits | Overall annual direct medical costs amounted to USD 3,305 (2010 currency), of which 60.4% and 39.6% accounted for inpatients and outpatient costs, respectively.                                                      | The largest cost component was medication at 38.4% (USD 1269) followed by diagnostic procedures and tests (35.6%)       | Funded by GlaxoSmithKline  |
| Petri  | 2015 | USA         | Systemic lupus erythematosus | Health payer | 6 years  | 1,721 pregnant women with SLE matched with 8605 controls | Direct medical costs including inpatient, outpatient, pharmaceuticals     | The mean (SD) total all-cause direct healthcare costs were \$21,509 (\$24,438) for pregnant women compared to \$11,481                                                                                                | Not reported                                                                                                            | Sponsored by UCB Pharma    |

|            |      |     |                                     |              |         |                        |                                                                       |                                                                                                                                                                                                                                                                      |                                                                                                                                        |                     |
|------------|------|-----|-------------------------------------|--------------|---------|------------------------|-----------------------------------------------------------------------|----------------------------------------------------------------------------------------------------------------------------------------------------------------------------------------------------------------------------------------------------------------------|----------------------------------------------------------------------------------------------------------------------------------------|---------------------|
|            |      |     |                                     |              |         |                        |                                                                       | (\$10,619; p < 0.0001) for controls.                                                                                                                                                                                                                                 |                                                                                                                                        |                     |
| Pollissard | 2021 | USA | Thrombotic thrombocytopenic purpura | Health payer | 8 years | 2,279 (65.1% female)   | Direct medical costs including out of pocket contributions            | Total all-cause healthcare expenditures were significantly higher for patients with aTTP vs. without aTTP. Incremental cost of care varied by payer: Medicare Fee For Service: \$7,124; Medicare Advantage: \$5,918, commercial: \$5,151, managed Medicaid: \$5,431) | Across all payer types, hospitalizations were the major driver of healthcare expenditures                                              | Sponsored by Sanofi |
| Poudel     | 2018 | USA | Systemic sclerosis                  | Health payer | 1 year  | 9,731 hospitalisations | Direct medical costs including inpatient, outpatient, pharmaceuticals | Median (interquartile range) cost was US\$8,885 (-5,169, 15,921)                                                                                                                                                                                                     | Higher cost of hospitalisation was predicted by the following factors: hospital from the West region, acute renal failure, acute bowel | No funding received |

|       |      |          |                                                               |              |         |                                                                                    |                                                                                                   |                                                                                                                                                                             |                                                                                                                           |                                                           |
|-------|------|----------|---------------------------------------------------------------|--------------|---------|------------------------------------------------------------------------------------|---------------------------------------------------------------------------------------------------|-----------------------------------------------------------------------------------------------------------------------------------------------------------------------------|---------------------------------------------------------------------------------------------------------------------------|-----------------------------------------------------------|
|       |      |          |                                                               |              |         |                                                                                    |                                                                                                   |                                                                                                                                                                             | obstruction and aspiration (aOR > 2.0 with P < 0.0001 for all).                                                           |                                                           |
| Prada | 2021 | Colombia | Systemic lupus erythematosus with and without lupus nephritis | Health payer | 2 years | 3,295 (90.1% female): 1,117 SLE patients with LN and 2,475 SLE patients without LN | Direct medical costs including inpatient, outpatient, pharmaceuticals                             | Average annual per-patient, all-claims, all-cause direct cost for lupus nephritis was US\$ 12,624, 7.5 times higher than the average lupus patient without lupus nephritis. | The cost and frequency of procedures, and drug costs.                                                                     | No funding source reported                                |
| Qi    | 2021 | China    | Gaucher Disease Type 1                                        | Patients     | NA      | 98: 49 patients (49% female) and 49 caregivers                                     | Direct medical, direct non-medical, and indirect costs (including daily lost wages of caregivers) | Average annual economic burden of GD was estimated at \$48,771. Indirect costs reflected an annual productivity loss of \$1,980 per patient.                                | Direct healthcare costs of GD accounted for 86% of total costs, followed by medicines (61%) and inpatient treatment (15%) | Funded by The National Social Science Foundation of China |
| Quock | 2018 | USA      | Amyloid light chain amyloidosis                               | Health payer | 1 years | 249 cases (41.8% female) matched to 747 controls                                   | Direct medical costs including inpatient, outpatient, excluding                                   | Mean (SD) healthcare costs were significantly higher for newly diagnosed AL amyloidosis patients than                                                                       | Inpatient hospital costs (\$28,126 [40,409]) and non-ED outpatient service costs                                          | Funded by Prothena Biosciences Inc.                       |

|       |          |     |                                       |                 |            |                            |                                                                                             |                                                                                                                                                                                                                                                                                                                                                                                   |                                                                                                                                       |                                              |
|-------|----------|-----|---------------------------------------|-----------------|------------|----------------------------|---------------------------------------------------------------------------------------------|-----------------------------------------------------------------------------------------------------------------------------------------------------------------------------------------------------------------------------------------------------------------------------------------------------------------------------------------------------------------------------------|---------------------------------------------------------------------------------------------------------------------------------------|----------------------------------------------|
|       |          |     |                                       |                 |            |                            | pharmaceuti<br>cals                                                                         | compared to<br>controls<br>(\$71,040<br>[65,766] vs<br>\$13,722<br>[27,493])                                                                                                                                                                                                                                                                                                      | (\$37,137<br>[37,363])                                                                                                                |                                              |
| Quock | 201<br>8 | USA | Amyloid light<br>chain<br>amyloidosis | Health<br>payer | 9<br>years | 7,326<br>(45.0%<br>female) | Direct<br>medical<br>costs<br>including<br>inpatient,<br>outpatient,<br>pharmaceuti<br>cals | Mean (SD) total<br>annual all-<br>cause<br>healthcare<br>costs among all<br>incident patients<br>were \$122,180<br>(159,074) in the<br>year following<br>diagnosis.<br>Among incident<br>patients with<br>≥24 months of<br>follow-up, total<br>mean (SD)<br>costs<br>decreased over<br>time from<br>\$104,672<br>(134,993) in<br>year 1 to<br>\$68,502<br>(121,711) in<br>year 2. | In the year<br>following<br>diagnosis,<br>medical (non-<br>outpatient<br>pharmacy) costs<br>accounted for<br>90.5% of total<br>costs. | Funded by<br>Prothena<br>Biosciences<br>Inc. |

|            |      |         |                                                                                      |              |          |                                       |                                                                       |                                                                                                                                                                                                                               |                                                                                                                                                                   |                                        |
|------------|------|---------|--------------------------------------------------------------------------------------|--------------|----------|---------------------------------------|-----------------------------------------------------------------------|-------------------------------------------------------------------------------------------------------------------------------------------------------------------------------------------------------------------------------|-------------------------------------------------------------------------------------------------------------------------------------------------------------------|----------------------------------------|
| Sieluk     | 2020 | USA     | Alpha-1 Antitrypsin Deficiency associated with chronic obstructive pulmonary disease | Health payer | 6 years  | 953 cases matched with 7,928 controls | Direct medical costs including inpatient, outpatient, pharmaceuticals | The incremental cost difference between AATD-associated COPD patients and controls totaled \$6861 [95% CI: \$3025 - \$10,698] and \$5772 [95% CI: \$1940 - \$9604] per patient before and after the index date, respectively. | Cases incurred higher outpatient costs (cost ratio: 1.490), higher costs for other services (cost ratio: 11.834) and prescription drug costs (cost ratio: 1.372). | No funding source reported             |
| Soerensen  | 2015 | Denmark | Metastatic renal cell carcinoma patients initiating targeted therapy                 | Health payer | 2 years  | 631 (32% female)                      | Direct medical costs and lost productivity costs                      | Total health care costs per year were €5,348,352 in 2002–2005 and €12,149,764 in 2006–2009. Productivity costs (foregone earnings) were €7,852 in 2006–2009 and €8,265 in 2002–2005                                           | Inpatient care was the main cost driver                                                                                                                           | Funded by unrestricted research grants |
| Strzelczyk | 2021 | Germany | Tuberous sclerosis complex patients with and without epilepsy                        | Health payer | 10 years | 256: 93 with epilepsy and 163 without | Direct medical costs including inpatient, outpatient, pharmaceuticals | For all patients, the mean annual cost of healthcare was €6,139 per patient-year. Patients with epilepsy incurred more than twice the                                                                                         | Healthcare costs were mostly attributable to medication (35%) and inpatient care (29%). Patients with epilepsy had greater                                        | Funded by GW Pharmaceuticals           |



|          |      |       |                                                                                                                |              |         |                                                                                   |                                                                       |                                                                                                                                                |                                                                                                                       |                                |
|----------|------|-------|----------------------------------------------------------------------------------------------------------------|--------------|---------|-----------------------------------------------------------------------------------|-----------------------------------------------------------------------|------------------------------------------------------------------------------------------------------------------------------------------------|-----------------------------------------------------------------------------------------------------------------------|--------------------------------|
|          |      |       |                                                                                                                |              |         |                                                                                   |                                                                       | mean annual healthcare costs of those without epilepsy (€9091 vs. €4583)                                                                       | medication costs (€3819 vs. €1261 PPY)                                                                                |                                |
| Sun      | 2015 | USA   | Tuberous sclerosis complex patients following surgical resection of subependymal giant-cell astrocytoma (SEGA) | Health payer | 2 years | 47 (34% female)                                                                   | Direct medical costs including inpatient, outpatient, pharmaceuticals | Mean total direct medical costs per patient increased from \$8,543 for the pre-surgery year to \$85,397 for the post-surgery year.             | The majority of the cost increase came from inpatient care (\$67,792 or 88.2%) and outpatient care (\$8024 or 10.4%). | Funded by Novartis             |
| Sundaram | 2015 | USA   | Renal cell carcinoma post-nephrectomy                                                                          | Health payer | 2 years | 643: 269 (35.3% female) with recurrence and 374 (42.2% female) without recurrence | Direct medical costs including inpatient, outpatient, pharmaceuticals | Mean monthly total health care costs were \$10,834 for patients with recurrence compared to \$1,820 for nonrecurrence.                         | Inpatient costs                                                                                                       | Supported by Merck & Co., Inc. |
| Tanaka   | 2018 | Japan | Systemic lupus erythematosus                                                                                   | Health payer | 3 years | 295                                                                               | Direct medical costs including inpatient, outpatient, pharmaceuticals | The mean total all-cause direct medical cost per patient was \$29,135 and the corresponding costs increased with SLE severity: mild (\$7,184), | Inpatient costs were driven by management (55.6%), followed by medication (17.3%) and operation services (10.1%)      | Funded by GlaxoSmithKline      |

|            |      |     |                                                                  |              |        |                                            |                                                                       |                                                                                                                                                                          |                                                                               |                            |
|------------|------|-----|------------------------------------------------------------------|--------------|--------|--------------------------------------------|-----------------------------------------------------------------------|--------------------------------------------------------------------------------------------------------------------------------------------------------------------------|-------------------------------------------------------------------------------|----------------------------|
|            |      |     |                                                                  |              |        |                                            |                                                                       | moderate (\$16,862), and severe (\$46,122) (p < 0.001)                                                                                                                   |                                                                               |                            |
| Tanzer     | 2013 | USA | Systemic lupus erythematosus with and without kidney involvement | Patients     | 1 year | 4,193 SLE patients with kidney involvement | Inpatient costs only                                                  | Average hospitalization charge was greater for SLE patients with kidney involvement compared to those without kidney involvement (\$43,100 versus \$28,500; p < 0.0001). | SLE-associated acute kidney failure, transplant, and end-stage kidney disease | No funding source reported |
| Ungprasert | 2020 | USA | Polyarteritis nodosa (PAN)                                       | Health payer | NA     | 4,110 (61% female)                         | Direct medical costs including inpatient, outpatient, pharmaceuticals | The mean hospital costs for patients in the PAN cohort was \$24,048 compared to \$10,887 in the non-PAN cohort                                                           | Not reported                                                                  | No funding source reported |

|           |      |       |                                                          |              |           |                                                                                                    |                                                                       |                                                                                                                                                                                                                                                                                               |                                                                                                      |                                                     |
|-----------|------|-------|----------------------------------------------------------|--------------|-----------|----------------------------------------------------------------------------------------------------|-----------------------------------------------------------------------|-----------------------------------------------------------------------------------------------------------------------------------------------------------------------------------------------------------------------------------------------------------------------------------------------|------------------------------------------------------------------------------------------------------|-----------------------------------------------------|
| Vogelzang | 2017 | USA   | Renal cell carcinoma                                     | Health payer | 1 year    | 1,711 patients: 526 (41.6% female) initiating pazopanib, 1,185 (42.4% female) initiating sunitinib | Direct medical costs including inpatient, outpatient, pharmaceuticals | Among PAN patients, initiating pazopanib was associated with lower total all-cause health care costs (\$8,527 vs. \$10,924, respectively [mean difference=\$2,397]); total medical costs (\$3,991 vs. \$5,881); and inpatient costs (\$2,040 vs. \$3,731; all P<0.01) compared with sunitinib | Not reported                                                                                         | Funded by Novartis                                  |
| Wang      | 2023 | China | Systemic lupus erythematosus                             | Patients     | 18 months | 1,778 (92.5% female)                                                                               | Direct medical costs and non-medical costs                            | The average annual direct cost per patient was estimated at CNY 29,727                                                                                                                                                                                                                        | Direct medical costs accounted for 86% of total costs                                                | Funded by CAMS Innovation Fund for Medical Sciences |
| Yang      | 2021 | USA   | Neurofibromatosis type 1 related plexiform neurofibromas | Health payer | 3 years   | 383 (48% female)                                                                                   | Direct medical costs including inpatient, outpatient, pharmaceuticals | Mean (SD) total costs per patient per year during follow-up were \$17,275 (\$61,903)                                                                                                                                                                                                          | Medical costs constituted 85% of the total and were driven by inpatient costs (46% of medical costs) | Funded by Merck & Co., Inc                          |

|      |      |     |                    |              |           |                                                          |                                                                                    |                                                                                                                                                                                                                                                                  |                                                                                                                                                                                     |                            |
|------|------|-----|--------------------|--------------|-----------|----------------------------------------------------------|------------------------------------------------------------------------------------|------------------------------------------------------------------------------------------------------------------------------------------------------------------------------------------------------------------------------------------------------------------|-------------------------------------------------------------------------------------------------------------------------------------------------------------------------------------|----------------------------|
| Zhou | 2018 | USA | Systemic sclerosis | Health payer | 12 months | 2,192 (84.3% female) patients and 2,192 matched controls | Direct medical costs and indirect costs including absenteeism and disability costs | Unadjusted total annual direct healthcare costs were significantly higher for patients with Systemic sclerosis (\$22,016) than matched controls (\$5977). Unadjusted indirect costs were \$5170 for patients with Systemic sclerosis versus \$1663 for controls. | Of total annual direct costs, \$16,269 were medical costs and \$5746 pharmacy costs. Of indirect costs, disability accounted for \$1,554 and medically related absenteeism \$3,616. | No funding source reported |
|------|------|-----|--------------------|--------------|-----------|----------------------------------------------------------|------------------------------------------------------------------------------------|------------------------------------------------------------------------------------------------------------------------------------------------------------------------------------------------------------------------------------------------------------------|-------------------------------------------------------------------------------------------------------------------------------------------------------------------------------------|----------------------------|

**Table S3 – Overview of economic evaluation studies**

| Study ID                     | Country | Study design       | Disease              | Perspective                          | Time horizon (Discount rate) | Intervention                                                                     | Costs Driver                                                                                                                                                        | Primary result – considered cost effective? (Cost effectiveness, budget impacts, cost analyses)                                                             | Funding                        |
|------------------------------|---------|--------------------|----------------------|--------------------------------------|------------------------------|----------------------------------------------------------------------------------|---------------------------------------------------------------------------------------------------------------------------------------------------------------------|-------------------------------------------------------------------------------------------------------------------------------------------------------------|--------------------------------|
| Pharmaceutical interventions |         |                    |                      |                                      |                              |                                                                                  |                                                                                                                                                                     |                                                                                                                                                             |                                |
| Ambavane 2020                | US      | Cost-effectiveness | Renal Cell Carcinoma | Patients                             | 40 years (3%)                | nivolumab + ipilimumab vs tyrosine kinase inhibitor (TKI)-initiated sequences    | drug acquisition, administration, AE management, disease management                                                                                                 | Yes- 3.6-5.3 average QALYs gained for nivolumab + ipilimumab vs 2.1–3.7 QALYs for TKI. Incremental cost per QALY below \$150,000 for nivolumab + ipilimumab | Funded by Bristol-Myers Squibb |
| Amdahl 2016                  | Canada  | Cost-effectiveness | Renal Cell Carcinoma | Third payer/health system/government | 5 years (5%)                 | pazopanib compared with sunitinib as first-line treatment for patients with mRCC | Drug cost for pazopanib and sunitinib, dispensing and administration, routine follow-up care, disease progression and terminal care, and other direct medical costs | Yes- Pazopanib was estimated to yield 0.059 QALY                                                                                                            | Funded by GSK and Novartis     |
| Amdahl 2017                  | UK      | Cost-effectiveness | Renal Cell Carcinoma | Third payer/health system/government | 5 years (3.55%)              | pazopanib versus sunitinib                                                       | initiation, medication, and dispensing for pazopanib and sunitinib, pre-progression follow-up and monitoring,                                                       | Yes- pazopanib was estimated to provide more QALYs (0.0565, 95% CI: -0.0920 to 0.2126) at a lower cost (-£1,061, 95%                                        | not specified                  |

|               |             |                    |                                              |                                                   |                               |                                                                                                    |                                                                                                                                         |                                                                                                                                         |                                               |
|---------------|-------------|--------------------|----------------------------------------------|---------------------------------------------------|-------------------------------|----------------------------------------------------------------------------------------------------|-----------------------------------------------------------------------------------------------------------------------------------------|-----------------------------------------------------------------------------------------------------------------------------------------|-----------------------------------------------|
|               |             |                    |                                              |                                                   |                               |                                                                                                    | other mRCC-related care associated with pazopanib and sunitinib treatment during PFS, and post-progression supportive care              | CI: -£4,328 to £2,067) versus sunitinib.                                                                                                |                                               |
| Bensimon 2020 | US          | Cost-effectiveness | Renal Cell Carcinoma                         | Third payer/health system/government              | lifetime time horizon (3%)    | pembrolizumab/axitinib versus other first-line treatments of advanced RCC                          | First line treatment cost, subsequent line treatment cost, AE cost, disease management cost, terminal care cost                         | Yes- ICER of \$95,725/QALY versus sunitinib; \$128,210/QALY versus pazopanib; and was dominant versus avelumab/axitinib                 | not specified                                 |
| Çakar 2023    | Switzerland | Cost-effectiveness | Renal Cell Carcinoma                         | Health system                                     | 40 years (3%)                 | nivolumab plus ipilimumab versus both sunitinib and pazopanib for the treatment of first-line aRCC | Drug acquisition, drug administration, treatment initiation, Disease management, Subsequent treatment costs, terminal care and AE costs | Yes- ICER of CHF108,326/QALY gained versus sunitinib, and CHF106,996/QALY gained versus pazopanib                                       | Funded by Bristol Myers Squibb                |
| Capri 2020    | Italy       | Cost-effectiveness | Renal Cell Carcinoma                         | health system                                     | 5 years (3%)                  | pazopanib versus sunitinib as a first-line treatment                                               | Post-progression costs, treatment initiation costs.                                                                                     | Yes- pazopanib had higher QALYs (0.060) at lower costs (-€5,857) versus sunitinib                                                       | Funded by Novartis Pharmaceutical Corporation |
| Chan 2022     | China       | Cost-effectiveness | Metastatic, clear-cell, renal cell carcinoma | Third payer/health system/government and societal | 20-year lifetime horizon (3%) | nivolumab-ipilimumab vs pembrolizumab-axitinib vs sunitinib                                        | Costs for drugs, adverse events (AE), disease progression, palliative care, and hospitalization costs                                   | Yes- ICER of \$34,190/QALY for nivolumab-ipilimumab vs sunitinib; ICER of pembrolizumab-axitinib dominated by nivolumab-ipilimumab, and | not specified                                 |

|               |         |                    |                                        |                                                   |                                       |                                                                                                                                                 |                                                                                                                                                                                            |                                                                                                                                                                       |                                              |
|---------------|---------|--------------------|----------------------------------------|---------------------------------------------------|---------------------------------------|-------------------------------------------------------------------------------------------------------------------------------------------------|--------------------------------------------------------------------------------------------------------------------------------------------------------------------------------------------|-----------------------------------------------------------------------------------------------------------------------------------------------------------------------|----------------------------------------------|
|               |         |                    |                                        |                                                   |                                       |                                                                                                                                                 |                                                                                                                                                                                            | \$12,630,828/QALY vs sunitinib                                                                                                                                        |                                              |
| Chen 2019     | China   | Cost-effectiveness | Renal Cell Carcinoma                   | Third payer/health system/government and societal | lifetime time horizon (not specified) | pembrolizumab plus axitinib versus sunitinib for previously untreated patients with aRCC                                                        | Drug cost, PA subsequent treatment cost, Sunitinib subsequent treatment cost, BSC cost, Terminal care cost, AEs cost,                                                                      | No- ICER of US\$55,185/QALY versus sunitinib                                                                                                                          | National Natural Science Foundation of China |
| De Groot 2017 | Holland | Cost-effectiveness | Metastatic Renal Cell Carcinoma (mRCC) | Dutch healthcare sector                           | Lifetime (4%)                         | targeted therapies vs not receiving targeted therapy at all                                                                                     | not specified                                                                                                                                                                              | Yes- ICER of €105,011 per QALY gained compared to not using targeted therapy at all                                                                                   | Funded by Pfizer and Roche                   |
| Delea 2015    | US      | Cost-effectiveness | Renal Cell Carcinoma                   | Health system                                     | 37.5 months (3%)                      | pazopanib versus sunitinib                                                                                                                      | Medication costs, administration/dispensing, other costs associated with pazopanib and sunitinib treatment, Pre-progression routine follow-up and Post progression routine follow-up costs | Yes- ICER of pazopanib was dominant                                                                                                                                   | Funded by GlaxoSmith Kline                   |
| Deniz 2019    | US      | Cost-effectiveness | Advanced renal cell carcinoma (aRCC)   | US third-party payer                              | 25 years (3%)                         | Sunitinib followed by nivolumab & pazopanib followed by nivolumab vs axitinib, pazopanib, everolimus and cabozantinib as second-line treatments | Medication costs and subsequent supportive care                                                                                                                                            | Yes- Incremental costs per LY gained were \$49,592, \$73,927 and \$30,534 for nivolumab versus axitinib, pazopanib and everolimus-containing sequences, respectively. | Funded by Bristol-Myers Squibb               |

|               |             |                    |                      |                              |                                                             |                                                                             |                                                                                                                                             |                                                                                                                                       |                                                                                                                                                                       |
|---------------|-------------|--------------------|----------------------|------------------------------|-------------------------------------------------------------|-----------------------------------------------------------------------------|---------------------------------------------------------------------------------------------------------------------------------------------|---------------------------------------------------------------------------------------------------------------------------------------|-----------------------------------------------------------------------------------------------------------------------------------------------------------------------|
| Ding<br>2021  | US          | Cost-effectiveness | Renal Cell Carcinoma | U.S. payers' perspective     | lifetime time horizon (3%)                                  | pembrolizumab plus axitinib versus sunitinib in the first-line setting      | Drug cost, AE cost                                                                                                                          | Yes- ICER of \$148,676/QALY                                                                                                           | Funded by Merck & Co. Inc.                                                                                                                                            |
| Gupta<br>2023 | India       | Cost-effectiveness | Renal Cell Carcinoma | Patients & health system     | lifetime time horizon (3%)                                  | Sunitinib vs pazopanib vs pembrolizumab/ lenvatinib vs nivolumab/ipilimumab | Per cycle cost of drug, Health system cost (Outpatient consultation, Day-care visit), OOPE, Per cycle cost of management of adverse effects | Yes- Sunitinib incurs an average cost of ₹ 143,269 (\$1,939 USD) per QALY lived                                                       | Roche (Inst), Sanofi (Inst), Johnson & Johnson (Inst), Amgen (Inst), Celltrion (Inst), Oncostem Diagnostics (Inst), Novartis (Inst), AstraZeneca (Inst), Intas (Inst) |
| Kim<br>2021   | South Korea | Cost-effectiveness | Renal Cell Carcinoma | societal perspective         | 30 years (5%)                                               | cabozantinib compared to nivolumab                                          | Treatment cost, Disease management cost, Adverse event cost, Productivity loss, End-of-life cost                                            | Yes- ICUR of \$34,445 per QALY                                                                                                        | National Research Foundation of Korea                                                                                                                                 |
| Kim<br>2021   | Australia   | Cost-effectiveness | Renal Cell Carcinoma | Australian healthcare system | Scenario 1: 60 month (5 yrs)<br>Scenario 2: 110 months (5%) | nivolumab versus everolimus                                                 | The cost of nivolumab, time horizon and utilities were main drivers                                                                         | Yes- ICER of \$266,871/QALY for scenario 1 (30 months clinical data), and \$213,320/QALY for scenario 2 (80 months clinical data with | None                                                                                                                                                                  |



|           |    |                    |                                      |                                      |                            |                                                                                                                                                                       |                                                                                                                                                         |                                                                                                                                                                                                                                                                                                |                                                                                                           |
|-----------|----|--------------------|--------------------------------------|--------------------------------------|----------------------------|-----------------------------------------------------------------------------------------------------------------------------------------------------------------------|---------------------------------------------------------------------------------------------------------------------------------------------------------|------------------------------------------------------------------------------------------------------------------------------------------------------------------------------------------------------------------------------------------------------------------------------------------------|-----------------------------------------------------------------------------------------------------------|
|           |    |                    |                                      |                                      |                            |                                                                                                                                                                       |                                                                                                                                                         | updated everolimus price)                                                                                                                                                                                                                                                                      |                                                                                                           |
| Li 2021   | US | Cost-effectiveness | Advanced renal cell carcinoma (aRCC) | Third payer/health system/government | lifetime time horizon (3%) | Lenvatinib plus pembrolizumab, nivolumab plus cabozantinib, nivolumab plus ipilimumab, pembrolizumab plus axitinib, avelumab plus axitinib, and sunitinib monotherapy | Management of Aes cost, drug cost of (Nivolumab, Ipilimumab, Axitinib, Avelumab, Sunitinib, Cabozantinib, Sorafenib), Cost of BSC, Administration cost, | ICERs of \$81282/QALY for pembrolizumab plus axitinib vs sunitinib and \$453391/QALY for nivolumab plus cabozantinib vs pembrolizumab plus axitinib. The rest of the strategies, such as Lenvatinib plus pembrolizumab, nivolumab plus ipilimumab, and avelumab plus axitinib, were dominated. | None                                                                                                      |
| Li 2021   | US | Cost-effectiveness | Renal Cell Carcinoma                 | Patients                             | lifetime time horizon (3%) | nivolumab plus cabozantinib compared with those of sunitinib                                                                                                          | Drug cost, Management of Aes, Administration cost                                                                                                       | No- ICER of \$508,987/QALY                                                                                                                                                                                                                                                                     | Health and Family Planning Commission of Hunan Province, Central Universities of Central South University |
| Liao 2021 | US | Cost-effectiveness | Renal Cell Carcinoma                 | not specified                        | lifetime time horizon (3%) | nivolumab plus cabozantinib with those of sunitinib                                                                                                                   | Drug costs, cost of managing AE, cost of second-line active treatment                                                                                   | Yes- ICER of \$863,720 per QALY gained                                                                                                                                                                                                                                                         | National Natural Science Foundation of China, West China Hospital,                                        |

|             |       |                    |                                      |                                      |               |                                                                                                                                                                                                                                                                             |                                                                                                                               |                                                                                                                                        |                                                                                                |
|-------------|-------|--------------------|--------------------------------------|--------------------------------------|---------------|-----------------------------------------------------------------------------------------------------------------------------------------------------------------------------------------------------------------------------------------------------------------------------|-------------------------------------------------------------------------------------------------------------------------------|----------------------------------------------------------------------------------------------------------------------------------------|------------------------------------------------------------------------------------------------|
|             |       |                    |                                      |                                      |               |                                                                                                                                                                                                                                                                             |                                                                                                                               |                                                                                                                                        | Sichuan University                                                                             |
| Lin 2023    | China | Cost-effectiveness | Renal Cell Carcinoma                 | not specified                        | 10 years (5%) | anlotinib as a first-line treatment for mRCC compared to that of sunitinib                                                                                                                                                                                                  | Direct medical costs included the following: drugs, laboratory tests, treatment of AEs (grade >3), and outpatient fees.       | Yes- ICER of - \$9,210,858.93 per LYs and - \$354,117.07 per QALYs gained                                                              | not specified                                                                                  |
| Lu 2020     | US    | Cost-effectiveness | Advanced renal cell carcinoma (aRCC) | US payer perspective                 | 10 years (3%) | avelumab plus axitinib versus sunitinib in first line treatment for advanced RCC                                                                                                                                                                                            | differences in utilities in PFS and after progression were the most influential factors                                       | No- ICER of \$565,232 per QALY                                                                                                         | Natural Science Foundation of Guangdong Province, National Natural Science Foundation of China |
| Mason 2023  | USA   | Cost-effectiveness | Renal Cell Carcinoma                 | Third payer/health system/government | 10 years (3%) | pembrolizumab + lenvatinib followed by cabozantinib vs pembrolizumab + axitinib followed by cabozantinib for patients with favourable risk, nivolumab + ipi limumab followed by cabozantinib vs cabozantinib followed by nivolumab for patients with intermediate/poor risk | price for infusion/injection, prices for oral medications, costs for general treatment and monitoring, BSC, and terminal care | Yes- for patients with favourable risks ICER of \$117 625 per QALY; In patients with intermediate or poor risk ICER of \$4184 per QALY | None                                                                                           |
| McCrea 2018 | USA   | Cost-effectiveness | Renal Cell Carcinoma                 | US payer perspective                 | 25 years (3%) | nivolumab versus everolimus                                                                                                                                                                                                                                                 | Initial treatment cost (Acquisition, administration,                                                                          | Yes- ICUR of \$US51,714 per QALY gained                                                                                                | None                                                                                           |

|                 |        |                    |                                        |                            |                                                               |                                                            |                                                                                                                           |                                                                                                  |                                                                                                                             |
|-----------------|--------|--------------------|----------------------------------------|----------------------------|---------------------------------------------------------------|------------------------------------------------------------|---------------------------------------------------------------------------------------------------------------------------|--------------------------------------------------------------------------------------------------|-----------------------------------------------------------------------------------------------------------------------------|
|                 |        |                    |                                        |                            |                                                               |                                                            | monitoring), subsequent treatment cost (Acquisition, administration, monitoring), AE costs                                | and \$US44,576 per life-year gained                                                              |                                                                                                                             |
| Meng 2018       | UK     | Cost-effectiveness | Renal Cell Carcinoma                   | not specified              | 30 years (3.5%)                                               | cabozantinib vs the standard of care                       | treatment costs, costs of adverse events, PFS health state costs, progressed health state costs, and terminal care costs. | Yes- ICER versus axitinib and everolimus were 98,967 GBP/QALY and 137,450 GBP/QALY, respectively | Funded by Ipsen Pharm                                                                                                       |
| Mihajlović 2013 | Serbia | Cost-effectiveness | Renal Cell Carcinoma                   | not specified              | lifetime time horizon (3% for cost, 1.5% for health outcomes) | everolimus vs best supportive care                         | direct costs of drug treatment and other medical interventions.                                                           | No- ICER of €86,978 per QALY                                                                     | not specified                                                                                                               |
| Nazha 2018      | Canada | Cost-utility       | Metastatic Renal Cell Carcinoma (mRCC) | Canadian Healthcare System | 5 years (1.5%)                                                | sunitinib versus pazopanib in first-line setting           | The major cost component (56%) is related to best supportive care (BSC)                                                   | Yes- ICUR of \$67,227/QALY for sunitinib versus pazopanib                                        | Canadian Center for Applied Research in Cancer Control, Coté-Sharp Family Foundation at the McGill University Health Center |
| Petrou 2015     | Cyprus | Cost-effectiveness | Renal Cell Carcinoma                   | Cyprus healthcare system   | 10 years (3.5%)                                               | ofaxitinib versus sorafenib, for the second-line treatment | Hospitalization, Specialist visit, FBC, U&E, pharmaceutical cost                                                          | Yes- ICER of 87,936 euro per QALY                                                                | not specified                                                                                                               |
| Petrou 2014     | Cyprus | Cost-effectiveness | Renal Cell Carcinoma                   | Cyprus healthcare system   | 10 years (3.5%)                                               | sorafenib as a second line treatment                       | Cost distribution of general medical and other                                                                            | No- ICER of €102,059 per QALY                                                                    | None                                                                                                                        |

|               |           |                    |                                        |                             |                          |                                                                           |                                                                                                          |                                                                                                                                                                                                                             |                  |
|---------------|-----------|--------------------|----------------------------------------|-----------------------------|--------------------------|---------------------------------------------------------------------------|----------------------------------------------------------------------------------------------------------|-----------------------------------------------------------------------------------------------------------------------------------------------------------------------------------------------------------------------------|------------------|
|               |           |                    |                                        |                             |                          |                                                                           | pharmaceutical costs                                                                                     |                                                                                                                                                                                                                             |                  |
| Pruis 2019    | Singapore | Cost-effectiveness | Renal Cell Carcinoma                   | Singapore healthcare system | 10 years (3%)            | sunitinib versus interferon- $\alpha$                                     | Drug costs, disease management cost, AE cost                                                             | No- ICER of SGD191,061 (USD139,757) per QALY gained                                                                                                                                                                         | None             |
| Raphael 2018  | Canada    | Cost-utility       | Metastatic Renal Cell Carcinoma (mRCC) | Canadian Healthcare System  | Lifetime (3%)            | nivolumab vs everolimus                                                   | Drug costs, wastage, treatment duration                                                                  | No- \$8138/QALM (Quality Adjusted Life Month) gained                                                                                                                                                                        | not specified    |
| Redig 2019    | Sweden    | Cost-effectiveness | Metastatic Renal Cell Carcinoma (mRCC) | Swedish healthcare system   | 10 years (not specified) | targeted therapies                                                        | TT costs                                                                                                 | Yes- Costs per LY gained were estimated at \$78,656 for the early TT period (2006–2008) and \$34,132 (2009–2010) for the later TT period.                                                                                   | Funded by Pfizer |
| Reinhorn 2019 | US        | Cost-effectiveness | Advanced renal cell carcinoma (aRCC)   | U.S. payer perspective      | 10 years (3%)            | nivolumab and ipilimumab compared with sunitinib for first-line treatment | not specified                                                                                            | Yes- ICER of \$125,739/QALY vs sunitinib                                                                                                                                                                                    | None             |
| Sarfaty 2018  | US        | Cost-effectiveness | Renal Cell Carcinoma                   | US payer perspective        | 10 years (3%)            | nivolumab for second-line treatment                                       | Only direct medical costs were considered, including drug, administration, and adverse event (AE) costs. | mixed results- ICER of \$146,532/QALY for nivolumab vs everolimus, and \$226,197/QALY versus placebo. Limiting the maximal treatment duration of nivolumab to 2 years reduced the ICER to \$121,788/QALY versus everolimus. | None             |

|             |               |                             |                                        |                                        |               |                                                                             |                                                                     |                                                                                                                       |                                              |
|-------------|---------------|-----------------------------|----------------------------------------|----------------------------------------|---------------|-----------------------------------------------------------------------------|---------------------------------------------------------------------|-----------------------------------------------------------------------------------------------------------------------|----------------------------------------------|
| Sharma 2023 | not specified | Cost-effectiveness          | Renal Cell Carcinoma                   | Health system                          | 5 years (3%)  | Pembrolizumab                                                               | not specified                                                       | No- ICER of \$331,613/QALY gained                                                                                     | None                                         |
| Shay 2021   | US            | Cost-effectiveness          | Renal Cell Carcinoma                   | US payer perspective                   | 10 years (3%) | nivolumab + ipilimumab vs pembrolizumab + axitinib vs avelumab + axitinib   | price for either pembrolizumab + axitinib or nivolumab + ipilimumab | Yes- ICER of NI versus PA was \$47,504.73/QALY; NI versus AA was \$96,533.11/QALY; PA versus AA was \$113,015.87/QALY | not specified                                |
| Vargas 2019 | Chile         | Cost-effectiveness/ utility | Metastatic Renal Cell Carcinoma (mRCC) | Chilean health care system             | 10 years (3%) | sunitinib versus pazopanib and best supportive care as first-line treatment | Utility data                                                        | No- ICER of \$62,327.11/QALY for PA versus BSC and \$85,885/QALY for Sunitinib versus Pazopanib                       | Pfizer Chile                                 |
| Wan 2017    | US/China      | Cost-utility                | Advanced renal cell carcinoma (aRCC)   | US and Chinese health care systems     | Lifetime (3%) | nivolumab for the second-line treatment of mRCC                             | Drug prices                                                         | No- \$151,676/QALY                                                                                                    | National Natural Science Foundation of China |
| Wan 2019    | USA           | Cost-effectiveness/ utility | Metastatic Renal Cell Carcinoma (mRCC) | US payer perspective                   | Lifetime (3%) | nivolumab plus ipilimumab vs sunitinib in the first-line setting            | overall survival hazard ratio and patient weight                    | Yes- \$108,363 per QALY                                                                                               | not specified                                |
| Wang H 2022 | China         | Cost-utility                | Advanced renal cell carcinoma (aRCC)   | Chinese health care system perspective | 20 years (5%) | nivolumab + cabozantinib strategy over sunitinib strategy                   | Drug prices                                                         | No- ICER of \$292,945 per QALY                                                                                        | None                                         |
| Wang Y 2022 | China         | Cost-utility                | Advanced renal cell                    | Chinese health care system perspective | Lifetime (5%) | lenvatinib plus pembrolizumab group vs                                      | Drug prices                                                         | No- ICER of 2,657,025 RMB/QALYs                                                                                       | None                                         |

|             |               |                             |                                      |                       |                    |                                                                                        |                                                                                  |                                                                                                                                                                   |                                                                                                                                |
|-------------|---------------|-----------------------------|--------------------------------------|-----------------------|--------------------|----------------------------------------------------------------------------------------|----------------------------------------------------------------------------------|-------------------------------------------------------------------------------------------------------------------------------------------------------------------|--------------------------------------------------------------------------------------------------------------------------------|
|             |               |                             | carcinoma (aRCC)                     |                       |                    | sunitinib group as first-line treatment                                                |                                                                                  |                                                                                                                                                                   |                                                                                                                                |
| Watson 2020 | USA           | Cost-utility                | Advanced renal cell carcinoma (aRCC) | US health care sector | not specified (3%) | Pembrolizumab followed by axitinib,                                                    | Drug prices                                                                      | No- ICER of \$172,532/QALY                                                                                                                                        | None                                                                                                                           |
| Wu 2018     | US, UK, China | Cost-utility                | Advanced renal cell carcinoma (aRCC) | Third party payer     | 10 years (3%)      | nivolumab plus ipilimumab as first-line therapy to the present standard care           | The price of sunitinib, nivolumab and ipilimumab                                 | ICERs for nivolumab plus ipilimumab over sunitinib: US \$ 85,506 /QALY; UK \$ 126,499/QALY; and China \$ 4682/QALY                                                | Shanghai Health Commission                                                                                                     |
| Zhu J 2020  | USA           | Cost-utility                | Advanced renal cell carcinoma (aRCC) | US payer perspective  | 20 years (3%)      | pembrolizumab plus axitinib treatment vs sunitinib treatment as a first-line treatment | The cost of pembrolizumab                                                        | No- ICER of \$249K per QALY compared to WTP of \$150k/QALY                                                                                                        | National Natural Science Foundation of China (grant no. 71704064), the Natural Science Foundation of Guangdong Province, China |
| Zhu Y 2023  | USA           | Cost-effectiveness/ utility | Advanced renal cell carcinoma (aRCC) | US payer perspective  | 20 years (3%)      | lenvatinib plus pembrolizumab) as the first-line treatment                             | The most influential factor in this model was the cost of pembrolizumab with LP. | Using a WTP threshold of \$150,000 per QALY, LP was cost-effective with an ICER of \$131,656 per QALY; LE was not cost-effective with an ICER of 201,928 per QALY | None                                                                                                                           |

|                     |                 |                    |                                                      |                                      |                                              |                                                                                           |                                                                                                                                           |                                                                                                                                                                                         |                                                                              |
|---------------------|-----------------|--------------------|------------------------------------------------------|--------------------------------------|----------------------------------------------|-------------------------------------------------------------------------------------------|-------------------------------------------------------------------------------------------------------------------------------------------|-----------------------------------------------------------------------------------------------------------------------------------------------------------------------------------------|------------------------------------------------------------------------------|
| Clark<br>2017       | US              | Cost-effectiveness | Autosomal dominant polycystic kidney disease (ADPKD) | US healthcare system                 | 30 days (0%)                                 | ACE (Angiotensin-converting enzymes inhibitors) vs ARB (angiotensin II receptor blockers) | total costs of ACE-I and ARB                                                                                                              | Yes- ACE-I dominated ARB                                                                                                                                                                | None                                                                         |
| Erickson<br>2013    | US              | Cost-utility       | Autosomal dominant polycystic kidney disease (ADPKD) | Societal                             | Lifetime (3%)                                | Tolvaptan vs soc                                                                          | Drug costs, other care costs (smaller than the drug costs)                                                                                | No- \$744 100 per QALY gained compared with standard care                                                                                                                               | National Institutes of Health and Agency for Healthcare Research and Quality |
| Rombach<br>2013     | Netherlands     | Cost-effectiveness | Fabry disease                                        | Dutch healthcare system              | lifetime time horizon (0%)                   | enzyme replacement therapy (ERT) compared to standard medical care                        | Inpatient hospital cost, drug cost, dialysis cost, transplant, Outpatient hospital cost, Productivity loss, psychologist, physician/other | Yes- extra costs per additional year free of end-organ damage and the extra costs per additional QALY range from €5.5 - €7.5 million                                                    | Ministry of Health (ZonMw)                                                   |
| van Dussen<br>2014  | The Netherlands | Cost-utility       | Gaucher Disease Type 1                               | Societal                             | Lifetime (1.5% for effects and 4% for costs) | enzyme replacement therapy (ERT) compared to standard medical care                        | Healthcare costs                                                                                                                          | No- ICER of €884,994 per QALY                                                                                                                                                           | Dutch Top Institute Pharma project                                           |
| Jogimahanti<br>2021 | US              | cost effectiveness | Giant Cell Arteritis                                 | Third payer/health system/government | not specified (not specified)                | tocilizumab in GCA compared with prednisone alone                                         | Cost of side effects in patients treated with prednisone and tocilizumab (Cost of Class I Severity, Cost of Class II Severity)            | Yes- Three out of the 4 group combinations of tocilizumab with prednisone demonstrated a statistically significant (P , 0.05) difference in cost compared with prednisone alone for GCA | not specified                                                                |

|                 |              |                    |                              |                                                   |                              |                                                                      |                                            |                                                                                                                                                                                                                                               |                                                                                                 |
|-----------------|--------------|--------------------|------------------------------|---------------------------------------------------|------------------------------|----------------------------------------------------------------------|--------------------------------------------|-----------------------------------------------------------------------------------------------------------------------------------------------------------------------------------------------------------------------------------------------|-------------------------------------------------------------------------------------------------|
| Alsawayegh 2023 | Saudi Arabia | Cost-effectiveness | Systemic Lupus Erythematosus | Third payer/health system/government              | 1.5 years (not specified)    | Belimumab vs soc                                                     | Cost of treatment between Belimumab vs soc | Mixed results- The mean difference in cost and SLEDAI-2K score reduction between belimumab versus the SoC were USD 5303.16 [95% CI: USD 2735.61– USD 7802.52] and 3.378 [95% CI: 1.769–6.831], respectively.                                  | Researchers Supporting Project number (RSP2023 R16), King Saud University, Riyadh, Saudi Arabia |
| Bindra 2023     | US           | Cost-effectiveness | Systemic Lupus Erythematosus | Third payer/health system/government and societal | 3 years (not specified)      | Acthar Gel (repository corticotropin injection) versus SoC treatment | Not specified                              | Yes- From a payer perspective Acthar Gel versus SoC resulted in ICER of \$133,110/QALY and \$94,818/QALY over 2 and 3 years; From a societal perspective, ICER were \$70,827 per QALY and \$32,525 per QALY over 2 and 3 years, respectively. | Funded by Mallinckrodt Pharmaceuticals                                                          |
| Otten 2022      | UK           | HTA                | Systemic Lupus Erythematosus | UK healthcare System                              | lifetime time horizon (3.5%) | belimumab with standard treatment                                    | AMS score coefficient for predicting organ | Yes- For the intravenous formulation, the company's and                                                                                                                                                                                       | National Institute for Health Research                                                          |



|                                  |          |                    |                              |                                      |                               |                                                                            |                                                                                                                                                |                                                                                                                                                                                                                 |                                               |
|----------------------------------|----------|--------------------|------------------------------|--------------------------------------|-------------------------------|----------------------------------------------------------------------------|------------------------------------------------------------------------------------------------------------------------------------------------|-----------------------------------------------------------------------------------------------------------------------------------------------------------------------------------------------------------------|-----------------------------------------------|
|                                  |          |                    |                              |                                      |                               |                                                                            | damage, the discontinuation rate following 2 years of treatment, and the treatment effect of belimumab at week 52                              | ERG's ICER estimates were £12,335 per QALY and £30,278 per QALY respectively; For the subcutaneous formulation, company's and ERG's ICER estimates were £8480 per QALY gained and £29,313 per QALY respectively | (NIHR) Health Technology Assessment Programme |
| Specchia 2014                    | Italy    | HTA                | Systemic Lupus Erythematosus | Health system                        | lifetime time horizon (3%)    | Belimumab                                                                  | not specified                                                                                                                                  | Yes- ICER of €32,859 per quality adjusted life year gained                                                                                                                                                      | Funded by GlaxoSmith Kline                    |
| Vandewalle 2021                  | Portugal | HTA                | X-linked hypophosphatemia    | Third payer/health system/government | not specified (not specified) | burosumab versus conventional therapy                                      | not specified                                                                                                                                  | n/a                                                                                                                                                                                                             | Kyowa Kirin International                     |
| Non-pharmaceutical interventions |          |                    |                              |                                      |                               |                                                                            |                                                                                                                                                |                                                                                                                                                                                                                 |                                               |
| Donovan 2022                     | Canada   | Cost-effectiveness | Renal Cell Carcinoma         | Health system                        | 5 years (1.5%)                | stereotactic body radiotherapy (SBRT) versus radiofrequency ablation (RFA) | Cost of personal radiation therapy, cost of RFA procedure, cost of SBRT, cost of surveillance CT, monthly, cost of metastatic disease, monthly | Yes- SBRT economically dominated RFA with a gain of 4.103 quality-adjusted life years (QALYs) and a cost of \$16,097, compared with 3.607 QALYs at a cost of \$18,324 for RFA                                   | Funded by Accuray Incorporated                |

|               |        |                    |                      |                                      |                              |                                               |                                                                                                                |                                                                                                                                                                                                                                                                                                                    |                                                                                                  |
|---------------|--------|--------------------|----------------------|--------------------------------------|------------------------------|-----------------------------------------------|----------------------------------------------------------------------------------------------------------------|--------------------------------------------------------------------------------------------------------------------------------------------------------------------------------------------------------------------------------------------------------------------------------------------------------------------|--------------------------------------------------------------------------------------------------|
|               |        |                    |                      |                                      |                              |                                               |                                                                                                                |                                                                                                                                                                                                                                                                                                                    |                                                                                                  |
| McGann 2015   | Angola | Cost-effectiveness | Sickle cell anemia   | Third payer/health system/government | 10 years (3%)                | newborn screening (NBS) and treatment program | discounting rate                                                                                               | Yes- cost per HLY gained is \$1380-\$3565                                                                                                                                                                                                                                                                          | Funded by Chevron                                                                                |
| Rossi 2021    | UK     | Cost-effectiveness | Renal Cell Carcinoma | National Health Service perspective  | lifetime time horizon (3.5%) | Screening of 60-year-old men                  | Screening costs (cost of AAA screening ultrasound in the UK), Assessment costs, Management, Annual drug costs. | mixed results- ICER of £18 092/QALY given a prevalence of RCC of 0.34%; ICER of £37 327/QALY given a prevalence of RCC of 0.16%                                                                                                                                                                                    | Kidney Cancer UK, The Urology Foundation, Renal Cancer Research Fund, CRUK Prevention Fellowship |
| Thompson 2022 | UK     | Cost-effectiveness | Renal Cell Carcinoma | Third payer/health system/government | lifetime time horizon (3.5%) | Annual renal imaging surveillance             | Not specified                                                                                                  | Yes- Incremental Net Monetary Benefit (INMB): £3522 (95% CI: -£2747 to £7652), Incremental Life Year Gained (LYG): 1.25 (95% CI: 0.30 to 1.86), and Incremental Quality-Adjusted Life Year (QALY): 0.29 (95% CI: 0.07 to 0.43), at an additional mean discounted cost of £2185 per patient (95% CI: £430 to £4144) | NIHR Manchester Biomedical Research Centre                                                       |

|                |           |                    |                                                      |                              |                          |                                                      |                                                                                                                                                     |                                                                                                                                            |                                                                                                                                        |
|----------------|-----------|--------------------|------------------------------------------------------|------------------------------|--------------------------|------------------------------------------------------|-----------------------------------------------------------------------------------------------------------------------------------------------------|--------------------------------------------------------------------------------------------------------------------------------------------|----------------------------------------------------------------------------------------------------------------------------------------|
| Walpole 2021   | Australia | Cost-effectiveness | Renal Cell Carcinoma                                 | Australian healthcare system | Lifetime (3%)            | surveillance of BAP1 germline carriers               | Probability of diagnosis and assumption that diagnosis leads to full uptake and adherence                                                           | Yes- \$1,265 USD per life year gained                                                                                                      | Australian Government Research Training Program, National Health and Medical Research Council of Australia, Highland Island Enterprise |
| Flahault 2017  | France    | Cost-utility       | Autosomal dominant polycystic kidney disease (ADPKD) | Health system                | Lifetime (not specified) | Systematic screening of ADPKD                        | Not identified (health system costs included)                                                                                                       | Yes- Systematic screening was deemed cost-effective and provides a gain of 0.68 quality-adjusted life years compared to targeted screening | None                                                                                                                                   |
| Malhorta 2019  | USA       | Cost-utility       | Autosomal dominant polycystic kidney disease (ADPKD) | Societal                     | not specified (3%)       | MR angiography screening and surveillance strategies | not specified                                                                                                                                       | Yes- ICER of \$71,525                                                                                                                      | not specified                                                                                                                          |
| Stavrakas 2022 | UK        | Cost-effectiveness | eosinophilic granulomatosis with polyangiitis        | Not specified                | 1 year (not specified)   | joint management of AAV                              | treatment decisions (After clinical assessment, 13 patients had changes made to their ENT treatment, 2 had some changes in their immunosuppression) | Yes- £215 for the MDT clinic vs £352 for attendance at individual clinics                                                                  | None                                                                                                                                   |

|             |         |                    |                               |               |                            |                                                                         |                                                                                                                                       |                                                                                                                                                                                                                                                                                                                       |                                                                                                                                                                                                         |
|-------------|---------|--------------------|-------------------------------|---------------|----------------------------|-------------------------------------------------------------------------|---------------------------------------------------------------------------------------------------------------------------------------|-----------------------------------------------------------------------------------------------------------------------------------------------------------------------------------------------------------------------------------------------------------------------------------------------------------------------|---------------------------------------------------------------------------------------------------------------------------------------------------------------------------------------------------------|
|             |         |                    |                               |               |                            |                                                                         | n, while 11 had changes in both ENT and Rheumatology treatment)                                                                       |                                                                                                                                                                                                                                                                                                                       |                                                                                                                                                                                                         |
| Lambe 2018  | Ireland | Cost-effectiveness | Fabry disease                 | not specified | 1 year (not specified)     | screening programme for cohort of stroke patients under 70 years of age | not specified                                                                                                                         | No                                                                                                                                                                                                                                                                                                                    | Not specified                                                                                                                                                                                           |
| Hatam 2013  | Iran    | Cost-utility       | galactosemia                  | health system | 1 year (n/a)               | neonatal screening program                                              | Mean cost of performing the screening, Cost of early treatment of screened patients, Cost of delayed treatment of unscreened patients | Yes- \$19641 savings per patient                                                                                                                                                                                                                                                                                      | Shiraz University of Medical Sciences                                                                                                                                                                   |
| Laskin 2013 | US      | Cost-effectiveness | Idiopathic Nephrotic Syndrome | not specified | lifetime time horizon (3%) | LTBI screening strategy                                                 | TST (Nurse interpretation, test, travel time), Questionnaire, IGRA (interferon release assay), Deaths, NS relapse and NS onset        | Mixed results- At an LTBI prevalence of 1.1%, no screening strategy dominated (\$2,201; 29.3356 QALYs) targeted screening (\$2,218; 29.3356 QALYs) and universal TST (\$2,481; 29.3347 QALYs). At a prevalence >10.3%, targeted screening with a risk-factor questionnaire was the most cost-effective option. Higher | National Center for Research Resources, the Office of the National Coordinator for Health Information Technology, Gilead Sciences Inc, National Institute of Diabetes and Digestive and Kidney Diseases |

|               |               |                    |                              |                       |                          |                                                                                                                |                                                                                                                                                    |                                                                                                                               |                                                                                                                                                                                                                                                |
|---------------|---------------|--------------------|------------------------------|-----------------------|--------------------------|----------------------------------------------------------------------------------------------------------------|----------------------------------------------------------------------------------------------------------------------------------------------------|-------------------------------------------------------------------------------------------------------------------------------|------------------------------------------------------------------------------------------------------------------------------------------------------------------------------------------------------------------------------------------------|
|               |               |                    |                              |                       |                          |                                                                                                                |                                                                                                                                                    | than a prevalence of 58.5%, universal TST was preferred.                                                                      |                                                                                                                                                                                                                                                |
| Williams 2019 | US            | Cost-effectiveness | Systemic Lupus Erythematosus | US health care sector | 12 weeks (not specified) | Lupus Self-management (PALS) program                                                                           | staff salaries, project overhead, supplies and equipment. The largest cost categories per patient were for participant incentives and cell phones. | Yes- There was a savings of \$23,417 per individual receiving the intervention with a benefit-cost ratio of 18.13 per patient | National Institutes of Health/National Center for Advancing Translational Sciences, the Rheumatology and Immunology Multidisciplinary Clinical Research Center National Institutes of Health/National Institute of Arthritis and Skin Diseases |
| Fallah 2016   | not specified | Cost-utility       | Tuberous Sclerosis Complex   | Third party payer     | 5 years (3%)             | resective epilepsy surgery vs vagus nerve stimulator implantation vs ketogenic diet vs addition of a third ASD | Surgery was the most costly intervention, cost-effectiveness driven by this and utility values                                                     | The addition of a third ASD (\$6600 for a gain of 4.14 QALYs) was the most cost-effective treatment strategy                  | None                                                                                                                                                                                                                                           |

|                                                             |        |                        |                                     |               |                               |                                                                                                     |                                                                                                                                                                                                                        |                                                                                     |                               |
|-------------------------------------------------------------|--------|------------------------|-------------------------------------|---------------|-------------------------------|-----------------------------------------------------------------------------------------------------|------------------------------------------------------------------------------------------------------------------------------------------------------------------------------------------------------------------------|-------------------------------------------------------------------------------------|-------------------------------|
| Jousselmé 2022                                              | France | Cost-effectiveness     | thrombotic thrombocytopenic purpura | not specified | 1 year (n/a)                  | ADAMTS13 activity (A Disintegrin and Metalloprotease with Thrombospondin type 1 repeats, member 13) | Biological costs, administrative costs, Cost of one kit                                                                                                                                                                | Yes- Mean differences between the two alternative diagnostic tests was \$11 323.60. | not specified                 |
| Kim 2017                                                    | US     | Cost-effectiveness     | thrombotic thrombocytopenic purpura | not specified | immediate 3-day outcomes (0%) | ADAMTS13 test and/or PLASMIC score                                                                  | In-house ADAMTS13 assay, Send-out ADAMTS13 assay, TPE, Infection, Catheter thrombosis, Venous thrombosis, Bleeding or major complications                                                                              | Yes- ICER of in-house ADAMTS13: \$49,644 per death avoided                          | National Institutes of Health |
| <b>Overview of included budget impact and cost analyses</b> |        |                        |                                     |               |                               |                                                                                                     |                                                                                                                                                                                                                        |                                                                                     |                               |
| Aiello 2023                                                 | Italy  | Budget impact analysis | familial Mediterranean fever        | Health system | 3 years                       | Anakinra                                                                                            | drug cost of Anakinra                                                                                                                                                                                                  | cumulative savings of €14,121,080 over 3 years                                      | Sobi S.r.l., Milan, Italy,    |
| Cevey 2019                                                  | Spain  | Budget impact analysis | Systemic Lupus Erythematosus        | Health system | 3 years                       | belimumab IV to belimumab SC until reaching approximately 17% of the market share                   | Treatment cost: (€11,902.80 per patient for belimumab SC, €12,448.28 per patient for belimumab IV during ongoing phase, and 14,363.40 per patient for belimumab IV on loading phase; Administration cost: €3388.72 per | Savings in direct healthcare costs of 6 million euros over the 3 years.             | GlaxoSmith Kline              |

|             |       |                        |                                     |               |                                             |                                                                                        |                                                                                                                                                                                                                                                                                            |                                                                                      |                 |
|-------------|-------|------------------------|-------------------------------------|---------------|---------------------------------------------|----------------------------------------------------------------------------------------|--------------------------------------------------------------------------------------------------------------------------------------------------------------------------------------------------------------------------------------------------------------------------------------------|--------------------------------------------------------------------------------------|-----------------|
|             |       |                        |                                     |               |                                             |                                                                                        | patient on ongoing phase and €3910.07 per patient on loading phase                                                                                                                                                                                                                         |                                                                                      |                 |
| Clarke 2018 | USA   | Budget impact analysis | Systemic Lupus Erythematosus        | Health payer  | 4 years                                     | diagnosing SLE using MAP (multivariate assay panel)                                    | Incremental cost of MAP vs SDLTs, Average pre-diagnosis cost per patient with SLE/year, Average pre-diagnosis cost per patient without SLE/yea, Average per patient cost for mild, moderate, severe SLE/year. Average cost of true positive, false positive, true negative, false negative | \$1,991,152 cost savings                                                             | Not specified   |
| Goshua 2020 | USA   | Budget impact analysis | thrombotic thrombocytopenic purpura | Health payer  | between 1 January 2004 and 31 December 2018 | Rituximab                                                                              | inpatient cost (including inpatient medicine bed, professional and technical cost of TPE) and total cost of treatment with 1 rituximab dose                                                                                                                                                | Cost savings of \$905 906 for non-relapse TTP; \$425 736 for relapse TTP             | None            |
| Hutson 2021 | USA   | Budget impact analysis | Renal Cell Carcinoma                | Health payer  | October 1, 2013, through March 31, 2018     | first-line (1L) tyrosine kinase inhibitors (TKIs) followed by second-line (2L) therapy | delayed disease progression as a result of 1L, 2L                                                                                                                                                                                                                                          | lower total health care costs (\$10,342 vs \$13,388; P=0.0347) per patient per month | EMD Serono Inc. |
| Khatab 2022 | Egypt | Budget impact analysis | Systemic Lupus Erythematosus        | Health system | between 2018 and 2020                       | mycophenolate mofetil or cyclophosphamide as induction therapy                         | Immunosuppressants, lab tests, hospitalization ICU, physician visits                                                                                                                                                                                                                       | \$2339.69 versus \$1329.03 for MMF vs CYC, (p <0.001)                                | None            |

|                  |     |                              |                                          |                                             |               |                                                                                 |                                                                                                                                                                                                                                                                         |                                                                                                                                                                                                                  |                               |
|------------------|-----|------------------------------|------------------------------------------|---------------------------------------------|---------------|---------------------------------------------------------------------------------|-------------------------------------------------------------------------------------------------------------------------------------------------------------------------------------------------------------------------------------------------------------------------|------------------------------------------------------------------------------------------------------------------------------------------------------------------------------------------------------------------|-------------------------------|
| Kim<br>2020      | USA | Budget<br>impact<br>analysis | Thrombotic<br>microangiopat<br>hy        | Health system                               | 6 days        | Delay in<br>ADAMTS13<br>measurement                                             | The delay modelled<br>to impact speed to<br>treatment which<br>reduces mortality<br>and hospital stay                                                                                                                                                                   | \$27 524 to \$46<br>470 (ADAMTS13<br>result was<br>available on day<br>1 to day 5);<br>\$4155 to \$5123<br>additional cost<br>per day for delay                                                                  | Not<br>specified              |
| Lobo<br>2016     | USA | Budget<br>impact<br>analysis | Renal Cell<br>Carcinoma                  | Not stated (seems<br>to be health<br>payer) | 5 years       | RCC<br>surveillance<br>guidelines                                               | CXR,Chest<br>CT,Abdominal<br>US,Abdominal<br>CT,Abdominal MRI                                                                                                                                                                                                           | Low risk cohort:<br>\$587 (CUA),<br>\$1,076 (AUA),<br>\$1,705 (EAU)<br>and \$1,768<br>(NCCN) in 5<br>years; High risk<br>cohort: \$903<br>(CUA), \$2,525<br>(EAU) and<br>\$3,904 (AUA and<br>NCCN) in 5<br>years | None                          |
| Massachi<br>2020 | USA | Budget<br>impact<br>analysis | Acute<br>intermittent<br>porphyria (AIP) | Health payer                                | Not specified | hemin vs<br>givosiran                                                           | Drug cost, NSAIDs,<br>per day, Opioids,<br>per day, IV infusion<br>(CPT 96365),<br>CVAD (CPT<br>36561),<br>Comprehensive<br>metabolic panels,<br>Urinalyses (CPT<br>81000), PCP visits<br>(CPT 99213),<br>Specialist visit<br>(CPT 99214), ER<br>visit, Hospitalization | \$482,113 annual<br>savings                                                                                                                                                                                      | Recordati<br>Rare<br>Diseases |
| Muram<br>2013    | USA | Cost<br>comparison           | Neurofibromat<br>osis type 1             | Health payer                                | not specified | genetic testing<br>(SPRED1<br>testing alone vs<br>NF1 mutation<br>analysis with | Genetics exam,<br>Ophthalmology<br>exam, Magnetic<br>Resonance<br>Imaging, NF1                                                                                                                                                                                          | \$14-\$16 per<br>individual                                                                                                                                                                                      | Not<br>specified              |



|                 |        |                        |                                      |               |               |                        |                                                                                                                                                                          |                                           |                                      |
|-----------------|--------|------------------------|--------------------------------------|---------------|---------------|------------------------|--------------------------------------------------------------------------------------------------------------------------------------------------------------------------|-------------------------------------------|--------------------------------------|
|                 |        |                        |                                      |               |               | reflex to SPRED1)      | mutation analysis, SPRED1 mutation analysis, Reflex SPRED1 mutation analysis                                                                                             |                                           |                                      |
| Nalysnyk 2018   | USA    | Budget impact analysis | Gaucher disease type 1               | Health payer  | 3 years       | GDT1 Eliglustat        | Administration cost by site of care (home, outpatient, hospital), Drug acquisition costs (Imiglucerase, Velaglucerase, Taliglucerase, Eliglustat, Miglustat)             | \$1,526,710 savings annually              | Sanofi Genzyme                       |
| Perrin 2015     | USA    | Cost comparison        | Renal Cell Carcinoma                 | Health payer  | 10.6 years    | everolimus vs axitinib | drug acquisition costs, general practitioner and nurse visits, imaging and lab tests, hospitalizations, adverse events, post-progression therapies, and palliative care. | \$12,985 (lifetime horizon)               | Novartis Pharmaceuticals Corporation |
| Petrou 2023     | Cyprus | Budget impact analysis | Amyloid light chain (AL) amyloidosis | Health system | 5 years       | Daratumumab            | drug cost, other medication cost, administration and monitoring cost, AE cost                                                                                            | €254,264 (1st year) - €497,007 (5th year) | None                                 |
| Pierotti 2016   | Italy  | Budget impact analysis | Systemic Lupus Erythematosus         | Health system | 4 years       | Belimumab              | Belimumab, NSAIDs, Corticosteroids, Antimalarials, Immunosuppressants, Biologics                                                                                         | €6.2 million (3 years)                    | GlaxoSmith Kline                     |
| Pollissard 2021 | USA    | Budget impact analysis | Thrombotic thrombocytopenic purpura  | Health payer  | not specified | Caplacizumab           | Hospitalization (General ward day, ICU day, TPE procedure), Caplacizumab one                                                                                             | \$14,000                                  | Sanofi                               |

|                |                 |                        |                                        |               |                                              |                                                                           |                                                                                                                                          |                                                                                                                                     |                                            |
|----------------|-----------------|------------------------|----------------------------------------|---------------|----------------------------------------------|---------------------------------------------------------------------------|------------------------------------------------------------------------------------------------------------------------------------------|-------------------------------------------------------------------------------------------------------------------------------------|--------------------------------------------|
|                |                 |                        |                                        |               |                                              |                                                                           | dose, Therapeutic plasma exchange.                                                                                                       |                                                                                                                                     |                                            |
| Racsa 2015     | USA             | Budget impact analysis | Renal Cell Carcinoma                   | Health payer  | Between 1 November 2009 and 31 December 2012 | sunitinib vs pazopanib                                                    | First year medical cost, Index medication, non-index medication, RCC related, non-index, non-RCC related, adherent cost                  | total healthcare costs trended higher with sunitinib with mean difference of \$12,192                                               | Comprehensive Health Insights, Humana Inc. |
| Swallow 2018   | USA             | Cost comparison        | Metastatic Renal Cell Carcinoma (mRCC) | Health payer  | 1- and 2-year horizon                        | cabozantinib, nivolumab, and axitinib with everolimus for the second-line | price of the drugs, and the duration of treatment.                                                                                       | Additional costs of treatment with cabozantinib, nivolumab, or axitinib were \$34,141, \$19,371, and \$17,506 higher, respectively. | Novartis Pharmaceuticals                   |
| Vogelzang 2018 | USA             | Budget impact analysis | Advanced renal cell carcinoma (aRCC)   | Health payer  | Not specified                                | pazopanib vs sunitinib                                                    | Inpatient, outpatient, ER costs                                                                                                          | \$2,397 total healthcare cost; \$1,890 medical cost; \$1,691 inpatient cost                                                         | Novartis Pharmaceuticals                   |
| White 2021     | USA, UK, France | Cost savings           | Thrombotic thrombocytopenic purpura    | Health payer  | Not specified                                | ADAMTS-13 activity assay                                                  | incidence of TMA, cost of one TPE treatment, cost per HemosIL AcuStar ADAMTS-13 Activity test, Cost per standard ADAMTS-13 activity test | \$18 million, £1.2 million, and €1.6 million annually in US, UK, France                                                             | Instrumentation Laboratory                 |
| Villa 2013     | Spain           | Budget impact analysis | Renal Cell Carcinoma                   | Health system | 3 years                                      | Pazopanib                                                                 | Pharmacological costs per cycle for pazopanib and sunitinib, cost associated with the management of AE were                              | €6,723,622 savings                                                                                                                  | GlaxoSmith Kline España                    |

|                  |          |                 |                                        |               |                  |                                                                                                                                                              |                                                                             |                                                                                                                             |                                                               |
|------------------|----------|-----------------|----------------------------------------|---------------|------------------|--------------------------------------------------------------------------------------------------------------------------------------------------------------|-----------------------------------------------------------------------------|-----------------------------------------------------------------------------------------------------------------------------|---------------------------------------------------------------|
| Gil-Rojas 2022   | Colombia | Cost savings    | Thrombotic thrombocytopenic purpura    | Health payer  | 1 year           | Early identification and treatment of TTP                                                                                                                    | Diagnostics process cost, support measures, treatment cost, hospitalization | Estimated cost per avoided death was \$3414                                                                                 | Sanofi Colombia                                               |
| Botrel 2021      | Brazil   | Cost analysis   | Renal Cell Carcinoma                   | Health payer  | 12 months        | pembrolizumab plus axitinib and nivolumab plus ipilimumab                                                                                                    | Drugs and monitoring costs                                                  | P + A suggests better economic scenario versus N + I                                                                        | Merck Sharp & Dohme                                           |
| MacLean 2016     | USA      | Cost comparison | Advanced renal cell carcinoma (aRCC)   | Health payer  | 2009-2013        | sunitinib and pazopanib                                                                                                                                      | NA                                                                          | daily mean index medication costs were: sunitinib (\$216) vs pazopanib (\$177)                                              | Pfizer                                                        |
| Shi 2018         | China    | Cost analysis   | Metastatic Renal Cell Carcinoma (mRCC) | Health payer  | Not specified    | Sequential treatment regimens for mRCC                                                                                                                       | Medication costs, overall AE costs                                          | cost per patient per treatment month lowest for sunitinib + axitinib (¥14,898), highest for sunitinib + sorafenib (¥20,103) | Pfizer                                                        |
| Shenavandeh 2021 | Iran     | Cost analysis   | Systemic sclerosis                     | Health payer  | Not specified    | local injection of botulinum toxin-A (BTX-A) and intravenous prostaglandin analogs (iloprost/alprostadil) in patients with SSc with resistant digital ulcers | Medication costs, overall AE costs                                          | The cost was significantly lower in the BTX-A injection group (p < 0.0001)                                                  | Shiraz University of Medical Sciences                         |
| Shih 2019        | USA      | Cost analysis   | Renal Cell Carcinoma                   | Health payer  | 2007-2011        | new oncologic technologies                                                                                                                                   | NA                                                                          | new cancer drugs key driver of economic burden                                                                              | China Medical University Hospital, National Cancer Institute, |
| Vuorinen 2019    | Finland  | Cost analysis   | Metastatic Renal Cell                  | Health system | 4 years duration | Sunitinib                                                                                                                                                    | Drug prices                                                                 | Total treatment cost was 30,530 €/patient.                                                                                  | Pfizer Finland, Research,                                     |

|  |  |  |                     |  |  |  |  |  |                                                                                 |
|--|--|--|---------------------|--|--|--|--|--|---------------------------------------------------------------------------------|
|  |  |  | Carcinoma<br>(mRCC) |  |  |  |  |  | Development and<br>Innovation<br>Center of<br>Tampere<br>University<br>hospital |
|--|--|--|---------------------|--|--|--|--|--|---------------------------------------------------------------------------------|
